## **Single cell transcriptomics reveals opioid usage evokes widespread suppression of antiviral genes**

**Tanya T. Karagiannis<sup>1,2#</sup>, John P. Cleary Jr.<sup>2,3#</sup>, Nicholas G. Martin<sup>5</sup>, Elliot C. Nelson<sup>4</sup>,  
Christine S. Cheng<sup>1,2,3\*</sup>**

<sup>1</sup>**Program in Bioinformatics, Boston University, Boston, MA 02215, USA**

<sup>2</sup>**Department of Biology, Boston University, Boston, MA 02215, USA**

<sup>3</sup>**Program in Molecular Biology, Cell Biology and Biochemistry, Boston University, Boston, MA  
02215, USA**

<sup>4</sup>**Department of Psychiatry, Washington University School of Medicine, St. Louis, MO 63110, USA**

<sup>5</sup>**QIMR Berghofer Medical Research Institute 4006, Brisbane, Queensland, Australia**

**#**Contributed equally.

**\***Corresponding author: Correspondence and requests for materials should be addressed to

Christine S. Cheng (chcheng@bu.edu)

## **Abstract**

**Chronic opioid usage not only causes addiction behavior through the central nervous system (CNS), but it also modulates the peripheral immune system. However, whether opioid usage positively or negatively impacts the immune system is still controversial. In order to understand the immune modulatory effect of opioids in a systematic and unbiased way, we performed single cell RNA sequencing (scRNA-seq) of peripheral blood mononuclear cells (PBMCs) from opioid-dependent individuals and neighborhood non-dependent controls. We show that chronic opioid usage evokes widespread suppression of antiviral genes upon ex vivo endotoxin challenge in multiple innate and adaptive immune cell types. Furthermore, scRNA-seq revealed the same phenomenon with in vitro morphine treatment; after just a short exposure to morphine stimulation, we observed the same suppression of antiviral genes in multiple immune cell types. These findings indicate that both acute and chronic opioid exposure may be harmful to our immune system by suppressing the antiviral program, our body's defense response to potential infection. Our results suggest that further characterization of the immune modulatory effects of opioid use is critical to ensure the safety of clinical opioid usage.**

The opioid epidemic is a major threat to the global public health that affects millions of people and their families. Part of the problem is caused by the rapid increase in the number of opioid prescriptions written by medical practices starting from the late 1990s. From 1999 to 2017, overdoses related to prescription opioids have dramatically increased in the United States with overdose deaths found to be five times higher in 2017 compared to 1999<sup>1</sup>. In addition, opioids affect not only the CNS but also the peripheral immune system through the expression of a variety of opioid receptors on different immune cell types<sup>2</sup>. However, the effect of opioids on the peripheral immune system is complicated and involves various mechanisms. Studies have shown inconsistent results, where some suggest opioid usage is immunosuppressive while, in contrast,

others suggest opioids are immunoactivating<sup>2-4</sup>. Most of these studies focus on a particular immune cell subpopulation and a few candidate genes. Interestingly, epidemiological studies suggest that opioid usage is associated with increased susceptibility to opportunistic infections such as tuberculosis, HIV and pneumonia<sup>5-7</sup>.

Given the extensive use of prescription opioids and the global opioid epidemic, it is important to understand how opioid usage modulates different cell types in the immune system. Primary cells such as peripheral blood immune cells are usually comprised of heterogeneous cell populations. It is therefore highly time-consuming and labor-intensive to separate and study the individual cell types and generally not feasible given the limited input material from patient samples. The recent development of droplet-based single cell RNA-sequencing (scRNA-seq) approaches allows profiling of gene expression of thousands of single cells from a limited quantity of heterogeneous patient samples<sup>8,9</sup>. Here, we utilize droplet-based scRNA-seq to systematically characterize cell type specific gene expression in the peripheral immune system of opioid-dependent individuals compared to controls.

Using droplet-based scRNA-seq, we profiled gene expression in 57,271 single cells from the peripheral blood mononuclear cells (PBMCs) of 7 opioid-dependent individuals and 7 age/sex-matched non-dependent controls (averaging 3,980 single cells per individual) (Figure 1A). To examine opioid usage-specific changes in gene expression in response to pathogenic stimuli, we stimulated PBMCs from 3 of the 7 opioid-dependent individuals and 3 of the neighborhood controls with lipopolysaccharide (LPS, a component of gram-negative bacteria) for 3 hours and profiled 22,326 single cells. We sequenced these single cells to an average depth of 21,801 reads per cell and detected on average 805 genes and 2,810 transcripts per cell. To identify each of the immune cell subpopulations, we applied dimensionality reduction methods, including principal component analysis (PCA) and t-stochastic neighbor embedding (t-SNE), and unsupervised

graph-based clustering<sup>10,11</sup>. We identified 12 immune cell types/states using expression of canonical gene markers (Figure 1B, Figure S1-S3). Of the naïve state immune populations, we identified CD4<sup>+</sup> T cells, naïve CD8<sup>+</sup> T cells, memory CD8<sup>+</sup> T cells, NK cells, B cells, and monocytes. Of the LPS-stimulated immune populations, we identified CD4<sup>+</sup> T cells, CD8<sup>+</sup> T cells, activated T cells, B cells, NK cells, and monocytes. (Figure 1B, Figure S1-S3). We observed a slight shift in global gene expression states between opioid-dependent and control samples in most of the naïve cell types, while we observed larger differences in gene expression states in LPS-stimulated cell types (Figure 1B).

From differential gene expression analysis for each immune subpopulation, we observed a down-regulation of antiviral genes and interferon-stimulated genes (ISGs) in opioid-dependent samples compared to control samples. The suppression of antiviral genes was observed only in monocytes in naïve state and in all immune cell subpopulations under LPS stimulation except for CD8<sup>+</sup> T cells and monocytes (Figure 1C, Figure S4). This was further confirmed with gene set enrichment analysis of the resulting differential genes. We observed higher enrichment of defense response to virus and interferon signalling pathways in monocytes in naïve state and in most of the immune cell subpopulations in LPS stimulated state (Figure 1D). When focusing on the three major innate immune response transcriptional modules activated by LPS stimulation<sup>12</sup> (Supplementary Table 1), we found widespread suppression of antiviral genes in opioid-dependent cells across LPS stimulated immune subpopulations while peaked and sustained inflammatory genes were modestly affected by opioid usage (Figure 1E, Figure S5-S9). Because antiviral genes are activated by an LPS induced type I interferon (IFN $\alpha$  and IFN $\beta$ ) autocrine loop<sup>13</sup>, the potential mechanism for the suppression of antiviral genes in opioid users could be a higher expression of negative regulators of the interferon signaling pathway. Interestingly, we found the expression of two major interferon signaling inhibitors, suppressor of cytokine signaling *SOCS3*<sup>14</sup> and ubiquitin-specific peptidase *USP15*<sup>15</sup>, to be upregulated in opioid-dependent cells in the naïve state: CD4<sup>+</sup>

T cells and monocytes for *SOCS3* and NK cells, CD8+ T cells and B cells for *USP15* (Figure S10). Taken together, our data suggest that chronic opioid usage results in widespread suppression of antiviral genes affecting all immune subpopulations including both innate and adaptive immune cell types.

To examine the in vitro effect of opioids, we first treated primary human PBMCs from healthy individuals with a titration of morphine for 24 hours before stimulating with either a mock treatment (Untreated) or 100ng/mL LPS for three hours. We then performed RT-qPCR using primers against the major antiviral gene, *ISG15*, which was the most prominent antiviral gene downregulated in opioid-dependent cells across cell types. We found that PBMCs pretreated with morphine for 24 hours exhibited a dose-dependent inhibition to the induction of *ISG15* after LPS stimulation (Figure 2A). Furthermore, this inhibition was observed as quickly as three hours after morphine pretreatment (Figure S11). To test whether opioid-induced suppression of the type I interferon inducible antiviral pathway could be recovered through administration of type I interferons, we pretreated primary human PBMC for 24 hours with a titration of morphine, either alone or co-treated with 100U/mL IFN $\alpha$ , or IFN $\beta$ . Then we stimulated PBMCs with LPS for 3 hours and performed RT-qPCR against *ISG15* (Figure 2B). We found that both IFN $\alpha$  and IFN $\beta$  co-treatment reversed the morphine-induced suppression of *ISG15* (Figure 2B).

In order to characterize this phenomenon at a genome-wide scale and in every immune cell type in a cost-effective way, we performed scRNA-seq with an antibody-based cell hashing technique<sup>16</sup> to multiplex samples in droplet based scRNA-seq (Figure S12; see Methods). We profiled 10,903 single PBMCs treated with morphine alone or co-treated with 100U/mL IFN $\alpha$ , or IFN $\beta$  for 24 hours, then stimulated with LPS for 3 hours. We found a modest but consistent suppression of core antiviral genes in response to morphine exposure that could be rescued by

co-treatment with IFN $\alpha$  or IFN $\beta$  across all immune cell populations except for B cells and monocytes (Figure S14-S18). This phenotype was most pronounced in CD4 $^+$  and CD8 $^+$  T cells (Figure 2C).

Our study demonstrates that there is widespread suppression of the antiviral pathway in multiple innate and adaptive peripheral immune subpopulations both *ex vivo* and *in vitro* upon LPS stimulation. Our findings suggest a potential adverse effect from opioid usage on the defense response towards viral infection in the immune system. This may explain in part the higher susceptibility to viral infection in opioid users observed in epidemiological studies<sup>5-7,17</sup>. In addition, our *in vitro* findings also demonstrate that the observed suppression of antiviral pathway from our *ex vivo* experiments does not arise from needle sharing or presence of hepatitis C virus (HCV) infection in these injection opioid users. Given that most recreational opioid users inject drugs and many prescription opioid users are post-surgery or cancer patients under chemotherapy treatments, they are already more prone to infection; therefore suppression of antiviral genes with opioid usage brings clinical relevance and demonstrates the importance of carefully examining each individual case to avoid any possibility of comorbidity. Furthermore, our study demonstrated the utility of scRNA-seq as an unbiased tool to assess cell type specific genome-wide transcriptomic phenotype from limited quantity of patient samples. Upon a stimulation condition, such as LPS treatment, the opioid induced phenotype is much more pronounced and resembles the signal amplifying effect from electronic amplifiers. We anticipate this type of signal amplification method coupled with single cell transcriptomics will be of broad interest and can be applied to many other disease models where disease relevant stimuli can be used to activate naïve PBMCs isolated from patients that are otherwise quiescent to amplify signal over noisy background and thus reveal the phenotype of the disease.

## **Materials and Methods**

### PBMC from Opioid-Dependent Individuals

Frozen vials of PBMC prepared from the fresh blood of opioid-dependent (mostly heroin dependent), and non-dependent neighborhood control individuals were collected in the Comorbidity and Trauma Study (CATS)<sup>18,19</sup> and subsequently obtained from the biorepository of National Institute on Drug Abuse (NIDA, Rockville MD). We evaluated 14 age-matched subjects ranging from 24-45 years in age, with an equal number of male and female subjects. Cases were recruited from opioid replacement therapy (ORT) clinics in the greater Sydney, Australia region, while controls were recruited from areas in close proximity to ORT clinics (neighborhood controls). Cases and controls were required to be English speakers 18 years of age or older. Cases were participants in ORT for opioid-dependence while controls were excluded for recreational opioid use 11 or more times lifetime. All subjects provided written informed consent<sup>18,19</sup>. All samples were stripped of personally identifying information and assigned sample ID numbers prior to receipt.

### Single Cell Transcriptomic Analysis of PBMC from Opioid-Dependent Individuals

Frozen PBMCs isolated from the blood of opioid-dependent and non-dependent neighborhood individuals were revived, and live cells were isolated via FACS (Fluorescently Activated Cell Sorting) using a Sony SH800 cell sorter and a live/dead cell stain (LIVE/DEAD Fixable Green Cell Stain Kit, for 488nm Excitation, Thermo Fisher – L34969). Dilutions were made from all 14 samples as outlined in the Chromium Single Cell 3' Reagent Kit v2 User Guide (10X Genomics, CG00052 Rev.B), and 7000 cells per sample were used to perform the droplet-based Chromium Single Cell 3' scRNA-seq method (10X Genomics, Chromium Single Cell 3' Library and Gel Bead

Kit, Cat# PN-120237). 200,000 cells from 6 of the 14 samples (3 dependent and 3 non-dependent) were plated into a non-tissue culture treated 96-well plate in a leukocyte-supporting complete RPMI medium (10% HI-FBS, 1% L-Glutamate, 1% NEAA, 1% HEPES, 1% Sodium Pyruvate, 0.1% B-Mercaptoethanol). Lipopolysaccharide (LPS) (Invivogen, LPS-EK Ultrapure, Cat# tlr1-pekpls) was then added to a final concentration of 100ng/mL and the cells were incubated at 37°C for 3 hours. Cells were then collected, washed, and diluted to 1000 cells/ $\mu$ L before being used to perform the 10X Genomics Chromium Single Cell 3' method as outlined in the Single Cell 3' Reagent Kit v2 User Guide. Briefly, 20 $\mu$ L of 1000 cells/ $\mu$ L PBMC suspension from each subject/condition were combined, and 33.8  $\mu$ L of cell suspension (total cell number = 33,800) was mixed with 66.2  $\mu$ L of RT reaction mix before being added to a Chromium microfluidics chip already loaded with barcoded beads and partitioning oil. The chip was then placed within the Chromium controller where single cells and barcoded beads were encapsulated together within oil droplets. Reverse transcription was then performed within the oil droplets to produce barcoded cDNA. Barcoded cDNA was isolated from the partitioning oil using Silane DynaBeads (Thermo Fisher Scientific, Dynabeads MyONE Silane, Cat# 37002D) before amplification by PCR. Cleanup/size selection was performed on amplified cDNA using SPRIselect beads (Beckman-Coulter, SPRIselect, Cat# B23317) and cDNA quality was assessed using an Agilent 2100 BioAnalyzer and the High-Sensitivity DNA assay (Agilent, High-Sensitivity DNA Kit, Cat# 5067-4626). Sequencing Libraries were generated from cleaned, amplified cDNA using the 10X Chromium Kit's included reagents for fragmentation, sequencing adaptor ligation, and sample index PCR. Between each of these steps, libraries were cleaned/size selected using SPRIselect beads. Final quality of cDNA libraries was once again assessed using the Agilent BioAnalyzer High-Sensitivity DNA assay, and quality-confirmed libraries were sequenced using Illumina's NextSeq platform. All reagents listed in Supplementary Table 2.

#### PBMC from healthy Individuals used in In vitro assays



15 mL of fresh whole blood from healthy donors (Research Blood Components, Boston MA) was diluted 1:1 with warm PBS +2% FBS, mixed, and gently layered atop 30mL Ficoll-Paque density gradient medium (GE Healthcare, Ficoll Paque PLUS, Cat# 17-1440) in 50mL conical tubes. This process was repeated 7 times in processing 100mL of blood. Tubes were centrifuged for 20 min at 1200xg to separate leukocytes from red blood cells and plasma. The leukocyte-containing buffy coat was carefully transferred into new tubes, washed with warm PBS +2% FBS, counted, resuspended in DMSO and aliquoted. Isolated cells were then stored in liquid nitrogen until later experimental use. All reagents listed in Supplementary Table 2.

#### Controlled Substances

Solid Morphine Sulfate (Sigma Aldrich, Cat# M8777-25G) was obtained with approval and oversight from the controlled substances sub-office of the Boston University department of environmental health and safety. Aliquots of a 10mM stock solution were prepared and stored for further use in experimentation. All reagents listed in Supplementary Table 2

#### Morphine Titration in PBMCs from healthy individuals

Normal PBMC were revived in leukocyte-supporting complete RPMI medium and plated onto non-tissue culture treated 96 well plates at a density of  $2.0 \times 10^5$  cells/well (2 wells per condition,  $4.0 \times 10^5$  cells total). Cells were treated either with a mock treatment or a titration of Morphine Sulfate in RPMI complete medium ( $0 \mu\text{M}$ ,  $10 \mu\text{M}$ ,  $100 \mu\text{M}$ ) for 24 hours. At the end of the morphine incubation either medium or LPS (final concentration 100ng/mL) was added to the wells and cells were incubated for a further 3 hours, at the end of which the cells were collected, washed, and processed for total RNA using the ZymoPure QuickRNA MiniPrep kit (Zymo Research, Cat#

R1055). RNA samples were then used to perform RT-qPCR. All reagents listed in Supplementary Table 2

#### Interferon Rescue in Morphine Treated PBMCs from healthy individuals

Normal PBMC were revived and plated as described previously and either mock treated, treated with morphine sulfate (100 $\mu$ M) alone, or morphine sulfate (100 $\mu$ M) in the presence of 100U/mL IFN $\alpha$  (PBL Assay Science, Human Interferon Alpha A2, Cat#111100-1) or IFN $\beta$  (R&D Systems, Recombinant Human IFN-B, Cat# 8499-IF-010) for 24 hours. At the end of the incubation period cells were again treated either with medium or LPS for 3 hours, after which they were collected, washed, and processed for total RNA using the ZymoPure QuickRNA MiniPrep kit. RNA samples were then used to perform qRT-PCR. All reagents listed in Supplementary Table 2.

#### RT-qPCR analysis

Total RNA was isolated from cells using the ZymoPure QuickRNA MiniPrep kit. cDNA was synthesized using ~50ng of total RNA per sample (Thermo Fisher, SuperScript IV First-Strand Synthesis System, Cat# 18091200). 2  $\mu$ L of cDNA per reaction was then used to perform qPCR (Fisher Scientific, PowerUp SYBR Green Master Mix, Cat# A25742) with primers against transcripts of the Interferon target gene ISG15 (IDT, primer sequences in supplement) We used primers against ActB (IDT, primer sequences in supplement) as a housekeeping gene control. All reagents listed in Supplementary Table 2.

#### Cell Hashing scRNA-seq

Morphine titration and interferon rescue assays were performed as previously described. At the end of the treatment period cells were collected, washed, and each sample was “hashed” using unique oligonucleotide-barcoded antibodies<sup>16</sup> (Supplementary Table 3) to track the cells’ well/condition of origin. Briefly, cells were suspended in Cell Staining Buffer (BioLegend, Cat# 420201) and blocked using Human TruStain FcX reagent (BioLegend, Cat# 422301). Cells were then incubated with TotalSeq antibodies (BioLegend, Cat# 3964601, 394603, 394605, 394607, 394609, 394611, 394613, 394615, 394617, 394619, 394623, 394625), washed with PBS, and filtered through 40 $\mu$ M cell strainers (Bel-Art, Flowmi Cell Strainer, Cat# H13680-0040). Samples were then normalized to 1000 cells/ $\mu$ L, mixed in equal measure (20 $\mu$ L each), and used to perform the Chromium Single Cell 3’ scRNA-seq method as described previously. Additional primers were included in the cDNA amplification step to account for the TotalSeq oligonucleotide tags. During the post-amplification cleanup, supernatant containing amplified TotalSeq tags was collected and processed parallel to the standard 10X library fraction. All reagents listed in Supplementary Table 2.

### *Single Cell Analysis*

#### RNA-sequencing preprocessing

We used Cell Ranger version 2.1.0 (10x Genomics) to pool and process the raw RNA sequencing data. First, each sample sequencing library was demultiplexed based on the sample index read to generate FASTQ files for the paired-end reads. STAR aligner<sup>20</sup> was used to align reads to the human reference genome (GRCh38). After alignment, barcode and UMI filtering as well as UMI counting were performed to then generate the gene-cell barcode matrix for each sample library.

To perform an integrative analysis with the opioid-dependent and non-dependent control samples, all samples were normalized by sequencing depth and each sample gene-cell barcode matrix was concatenated together to create a large gene-barcode matrix in which cell-to-cell and sample-to-sample comparisons could be made.

### RNA-sequencing downstream and DE analysis

We used Seurat suite version 2.3<sup>10,11</sup> for downstream analysis. We used Seurat quality control metrics to select genes and cells for further analysis. Cells with less than 300 and greater than 2,000 detected genes were filtered out, as well as cells with greater than 10,000 UMIs were filtered out. Genes that were detected in less than 10 cells were removed. Gene counts for each cell were normalized by total expression, multiplied by a scale factor of 10,000 and transformed to log scale. Principal component analysis based on the highly variable genes detected (dispersion of 2) was performed for dimension reduction and the top 20 principal components (PCs) were selected. We clustered cells based on graph-based methods (KNN and Louvain community detection method) implemented in Seurat. The clusters and other known annotations were visualized using t-stochastic distributed embedding (tSNE)<sup>21</sup>.

To identify peripheral immune subpopulations, we performed differential expression analysis using Wilcoxon rank sum test between clusters to identify top expressing genes for each cluster for cell type identification implemented in Seurat. Cell type specific gene signatures were determined from the overlap of more highly expressed and canonical gene markers. In addition, we performed differential expression analysis within each cell type between control cells and opioid-dependent cells using Model-based Analysis of Single Cell Transcriptomics (MAST)<sup>22</sup> to identify genes upregulated and downregulated in opioid-dependent patients compared to controls (Supplementary Table 4). MAST uses a Hurdle model, a two-part generalized linear model in

which one process accounts for zero expression and the second process accounts for positive expression. Differentially expressed genes were evaluated according to their log fold change (greater than  $\log_2(1.5)$ ) and adjusted p-values (0.05).

### Cell Hashing preprocessing and analysis

For hashtag oligo (HTO) quantification, we first ran Cite-seq-Count<sup>16,23</sup> on the HTO fastq files to process the HTO reads with the parameters specific to 10x Genomics single cell 3' v2 data as stated in (<https://github.com/Hoohm/CITE-seq-Count>). In addition, we used Cell Ranger version 2.1.1 (10x Genomics) to process the raw sequencing RNA reads and Seurat suite version 2.3 for downstream analyses. To identify the cells sample-of-origin, we demultiplexed the HTOs and removed doublets and ambiguous cells using the Seurat pipeline for demultiplexing as mentioned in ([https://satijalab.org/seurat/hashing\\_vignette.html](https://satijalab.org/seurat/hashing_vignette.html)).

### Enrichment Analysis

We performed gene enrichment analysis of the list of differential genes between opioid-dependent individuals and non-dependent neighborhood controls for each cell type using Metascape<sup>24</sup> online tool (<http://metascape.org/>). The enrichment analysis was run using default settings, and was assessed and visualized through a heatmap of significance ( $-\log(P\text{-value})$ ). All heatmaps were generated using ComplexHeatmap R package<sup>25</sup>.

---

---

## **Acknowledgements**

We thank Dr. Todd A. Blute for his technical support on flow cytometry analysis. We would like to thank Dr. David J. Waxman and Dr. Andrew J. Henderson for critical reading of the manuscript.

The work was supported by NIH grant R61DA047032. T.T.K was supported by NIH institutional training grant T32GM100842. CATS data collection was funded by R01DA17305 and E.C.N. is supported by R01 DA042620, R01 DA046436, and R33 DA041883.

## **Data Availability**

Processed cell hashing scRNA-seq data is available from GEO under accession GSE128879.

## References

1. Prescription Opioid Data | Drug Overdose | CDC Injury Center. (2018). Available at: <https://www.cdc.gov/drugoverdose/data/prescribing.html>. (Accessed: 19th April 2019)
2. Liang, X., Liu, R., Chen, C., Ji, F. & Li, T. Opioid System Modulates the Immune Function: A Review. *Transl Perioper Pain Med* **1**, 5–13 (2016).
3. Plein, L. M. & Rittner, H. L. Opioids and the immune system - friend or foe. *Br. J. Pharmacol.* **175**, 2717–2725 (2018).
4. Al-Hashimi, M., Scott, S. W. M., Thompson, J. P. & Lambert, D. G. Opioids and immune modulation: more questions than answers. *Br. J. Anaesth.* **111**, 80–88 (2013).
5. Georges, H. *et al.* Epidemiological features and prognosis of severe community-acquired pneumococcal pneumonia. *Intensive Care Med.* **25**, 198–206 (1999).
6. Nath, A. *et al.* Molecular basis for interactions of HIV and drugs of abuse. *J. Acquir. Immune Defic. Syndr.* **31 Suppl 2**, S62–9 (2002).
7. Schwarz, R. K., Bruce, R. D., Ball, S. A., Herme, M. & Altice, F. L. Comparison of tuberculin skin testing reactivity in opioid-dependent patients seeking treatment with methadone versus buprenorphine: policy implications for tuberculosis screening. *Am. J. Drug Alcohol Abuse* **35**, 439–444 (2009).
8. Zheng, G. X. Y. *et al.* Massively parallel digital transcriptional profiling of single cells. *Nat. Commun.* **8**, 14049 (2017).
9. Baran-Gale, J., Chandra, T. & Kirschner, K. Experimental design for single-cell RNA sequencing. *Brief. Funct. Genomics* (2018). doi:10.1093/bfgp/elx035
10. Butler, A., Hoffman, P., Smibert, P., Papalexi, E. & Satija, R. Integrating single-cell transcriptomic data across different conditions, technologies, and species. *Nat. Biotechnol.* **36**, 411–420 (2018).
11. Macosko, E. Z. *et al.* Highly Parallel Genome-wide Expression Profiling of Individual Cells

- Using Nanoliter Droplets. *Cell* **161**, 1202–1214 (2015).
12. Shalek, A. K. *et al.* Single-cell RNA-seq reveals dynamic paracrine control of cellular variation. *Nature* **510**, 363–369 (2014).
  13. González-Navajas, J. M., Lee, J., David, M. & Raz, E. Immunomodulatory functions of type I interferons. *Nat. Rev. Immunol.* **12**, 125–135 (2012).
  14. Yoshimura, A., Naka, T. & Kubo, M. SOCS proteins, cytokine signalling and immune regulation. *Nature Reviews Immunology* **7**, 454–465 (2007).
  15. Zhang, H. *et al.* Ubiquitin-specific Protease 15 Negatively Regulates Virus-induced Type I Interferon Signaling via Catalytically-dependent and -independent Mechanisms. *Sci. Rep.* **5**, 11220 (2015).
  16. Stoeckius, M. *et al.* Cell Hashing with barcoded antibodies enables multiplexing and doublet detection for single cell genomics. *Genome Biol.* **19**, 224 (2018).
  17. Eidson, L. N. & Murphy, A. Z. Inflammatory mediators of opioid tolerance: Implications for dependency and addiction. *Peptides* **115**, 51–58 (2019).
  18. Shand, F. L., Degenhardt, L., Nelson, E. C. & Mattick, R. P. Predictors of social anxiety in an opioid dependent sample and a control sample. *Journal of Anxiety Disorders* **24**, 49–54 (2010).
  19. Nelson, E. C. *et al.* Association of OPRD1 polymorphisms with heroin dependence in a large case-control series. *Addiction Biology* **19**, 111–121 (2014).
  20. Dobin, A. *et al.* STAR: ultrafast universal RNA-seq aligner. *Bioinformatics* **29**, 15–21 (2013).
  21. van der Maaten, L., van der Maaten, L. & Hinton, G. Visualizing non-metric similarities in multiple maps. *Mach. Learn.* **87**, 33–55 (2011).
  22. Finak, G. *et al.* MAST: a flexible statistical framework for assessing transcriptional changes and characterizing heterogeneity in single-cell RNA sequencing data. *Genome Biol.* **16**, (2015).
  23. Stoeckius, M. *et al.* Simultaneous epitope and transcriptome measurement in single cells.



*Nat. Methods* **14**, 865–868 (2017).

24. Tripathi, S. *et al.* Meta- and Orthogonal Integration of Influenza ‘OMICs’ Data Defines a Role for UBR4 in Virus Budding. *Cell Host Microbe* **18**, 723–735 (2015).
25. Gu, Z., Eils, R. & Schlesner, M. Complex heatmaps reveal patterns and correlations in multidimensional genomic data. *Bioinformatics* **32**, 2847–2849 (2016).

**Figure 1. Single cell transcriptomics of PBMCs from opioid-dependent individuals revealed a widespread suppression of antiviral genes upon LPS stimulation.** **a**, Experimental workflow schematic. Peripheral blood from opioid-dependent individuals and control individuals were collected, PBMCs were isolated, and droplet based scRNA-seq was performed using Chromium Controller (10X Genomics). **b**, t-SNE plot of naive (51,336) and LPS (100ng/mL) stimulated (21,878) PBMCs were clustered (cells were filtered based on >300 and <2000 genes per cell, < 10000 UMIs per cell; see Methods) and identified into immune populations (top) and visualized by neighborhood control individuals and opioid-dependent individuals in each state (bottom): naive state control samples 1-7 (C1-C7), naive state opioid-dependent samples 1-7 (O1-O7), LPS-stimulated control samples 1-3 (C1-C3 (LPS)), LPS-stimulated opioid-dependent samples 1-3 O1-O3 (LPS). **c**, Volcano plot showing fold change of gene expression (log<sub>2</sub> scale) for downregulated and upregulated genes for opioid-dependent cells compared to non-dependent controls in naive monocytes, LPS stimulated NK cells, LPS stimulated CD4<sup>+</sup> T cells, and LPS stimulated activated T cells (x-axis) with significance of 0.05 (y-axis, -log<sub>10</sub> scale). Significant genes shown in black, significant antiviral genes shown in green, and insignificant genes shown in grey. **d**, Pathway enrichment analysis of significant differential genes across all naive and LPS stimulated cell types evaluated by -log<sub>10</sub>(P-value) as indicated by blue-purple scale (x-axis: cell type/state, y-axis: pathways). White represents an analysis which did not provide enrichment results for the specific pathway. **e**, Heatmap of scaled expression of core antiviral and inflammatory response genes (left) and average gene set expression (log expression) (right) observed in control and opioid-dependent cells of LPS-stimulated samples: control samples 1-3 (C1-C3) and opioid-dependent samples 1-3 (O1-O3). scRNA-seq gene expression profiles were from PBMCs stimulated with LPS in CD4<sup>+</sup> T cells, activated T cells, NK cells, and B cells. We found significant suppression of core antiviral gene expression from opioid-dependent individuals compared to control individuals (\*\*\*\*  $\leq 0.0001$ ). The three core innate immune response gene

modules:<sup>12</sup>: core antiviral (Core Antiviral), peaked inflammation (Peaked Inflamm), and sustained inflammation (Sustained Inflamm) (Supplementary Table 1).

**Figure 2: A short exposure to morphine treatment resulted in suppression of antiviral genes upon LPS stimulation.** **a**, Evaluation of mRNA expression level of ISG15 upon dose response to morphine. PBMCs from a healthy individual were pre-treated with a titration of morphine (0 $\mu$ M, 10 $\mu$ M, 100 $\mu$ M) for 24 hours followed by LPS (100ng/mL) stimulation for 3 hours. Expression of interferon pathway gene ISG15 was evaluated by RT-qPCR. Values are displayed as fold increase (log<sub>10</sub>) to gene expression in LPS stimulated cells over unstimulated cells. **b**, Rescue of morphine-induced suppression of ISG15 mRNA expression by IFN $\alpha$ / $\beta$  co-incubation. PBMCs from a healthy individual were pre-treated with morphine as described, along with a co-incubation of either IFN $\alpha$  or IFN $\beta$  and followed by LPS (100ng/mL) stimulation for 3 hours. Expression of ISG15 was evaluated by RT-qPCR. Values are displayed as fold increase (log<sub>10</sub>) to gene expression in LPS stimulated cells over unstimulated cells. **c**, Cell hashing scRNA-seq of healthy PBMCs pre-treated with morphine as described, along with a co-incubation of either IFN $\alpha$  or IFN $\beta$  and followed by LPS (100ng/mL) stimulation for 3 hours. Heatmaps of scaled single cell expression value of core antiviral genes (left) and violin plots of average core antiviral gene set expression (log scaled) (right) observed in LPS stimulated cells (LPS), morphine treated and LPS stimulated cells (Morphine + LPS), morphine and IFN $\alpha$  treated and LPS stimulated cells (Morphine + IFN $\alpha$  + LPS), and morphine and IFN $\beta$  treated and LPS stimulated cells (Morphine + IFN $\beta$  + LPS) in CD4<sup>+</sup> T cells and CD8<sup>+</sup> T Cells. Significance shown between LPS and Morphine + LPS, Morphine + LPS and Morphine + IFN $\alpha$  + LPS, and Morphine + LPS and Morphine + IFN $\beta$  + LPS (\*\*\*\*  $\leq 0.0001$ ).

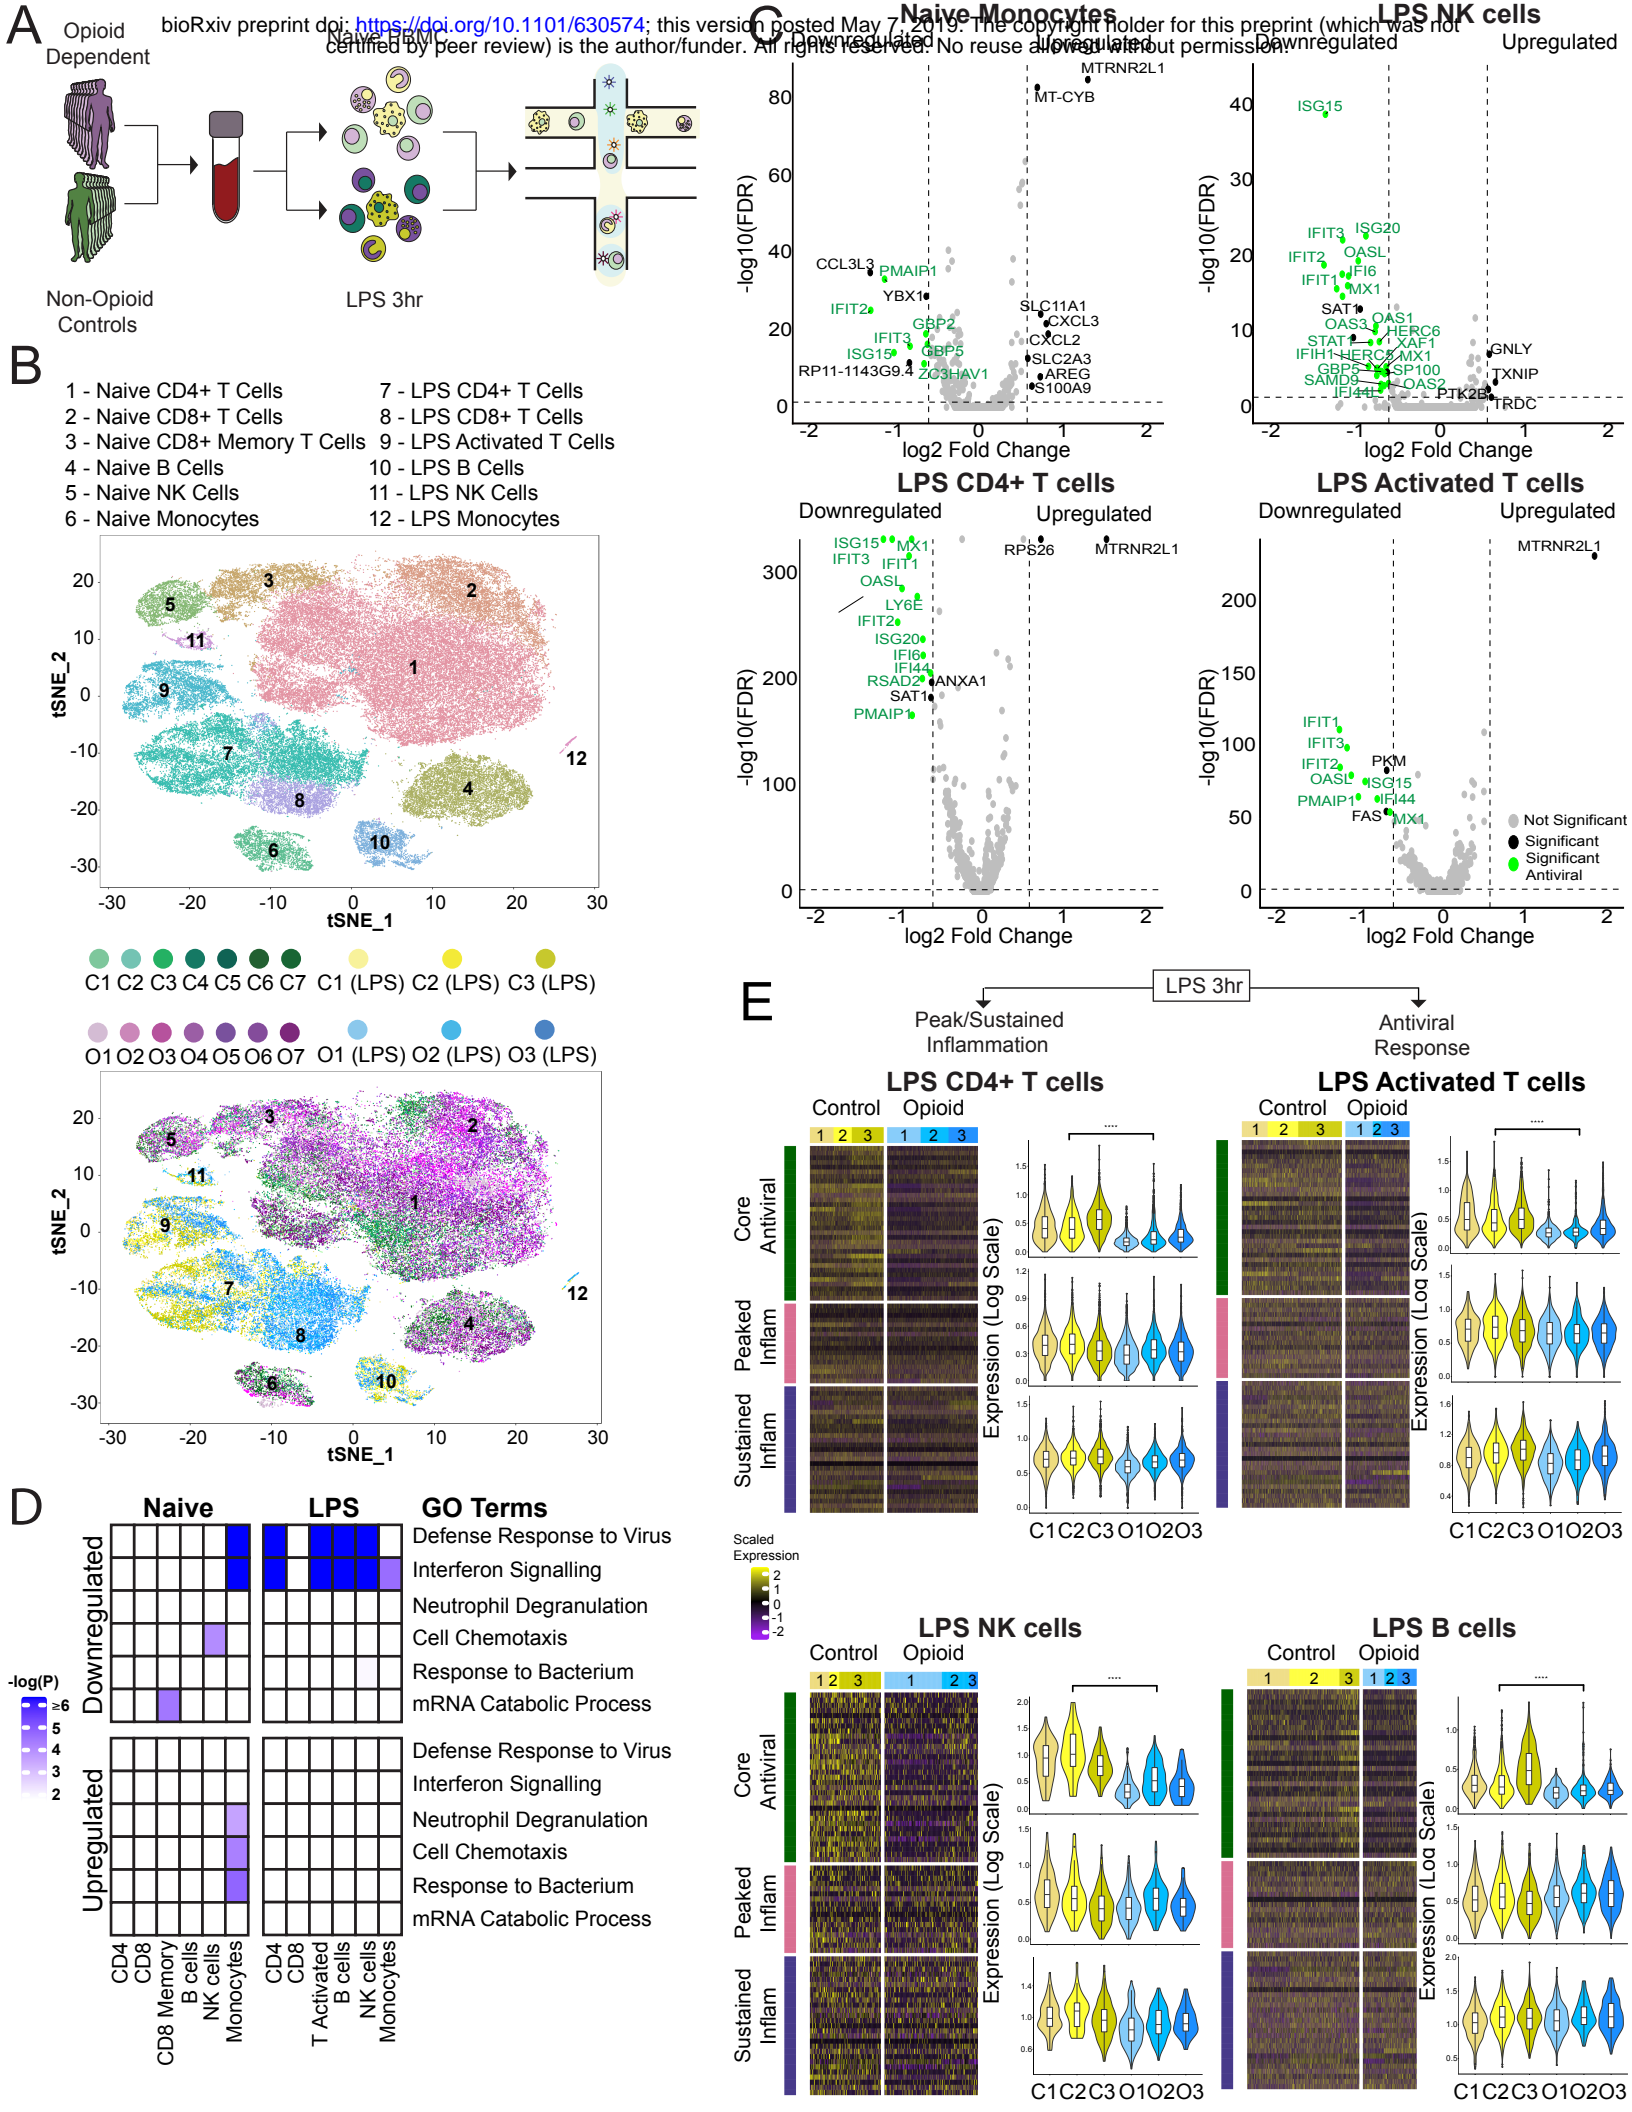

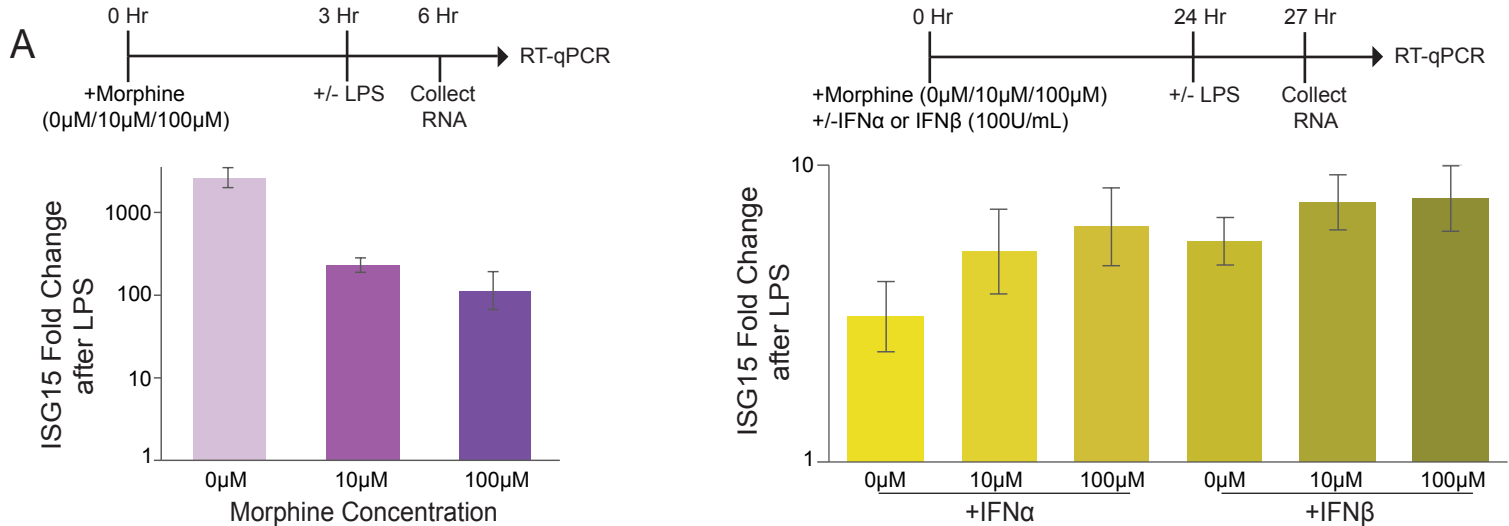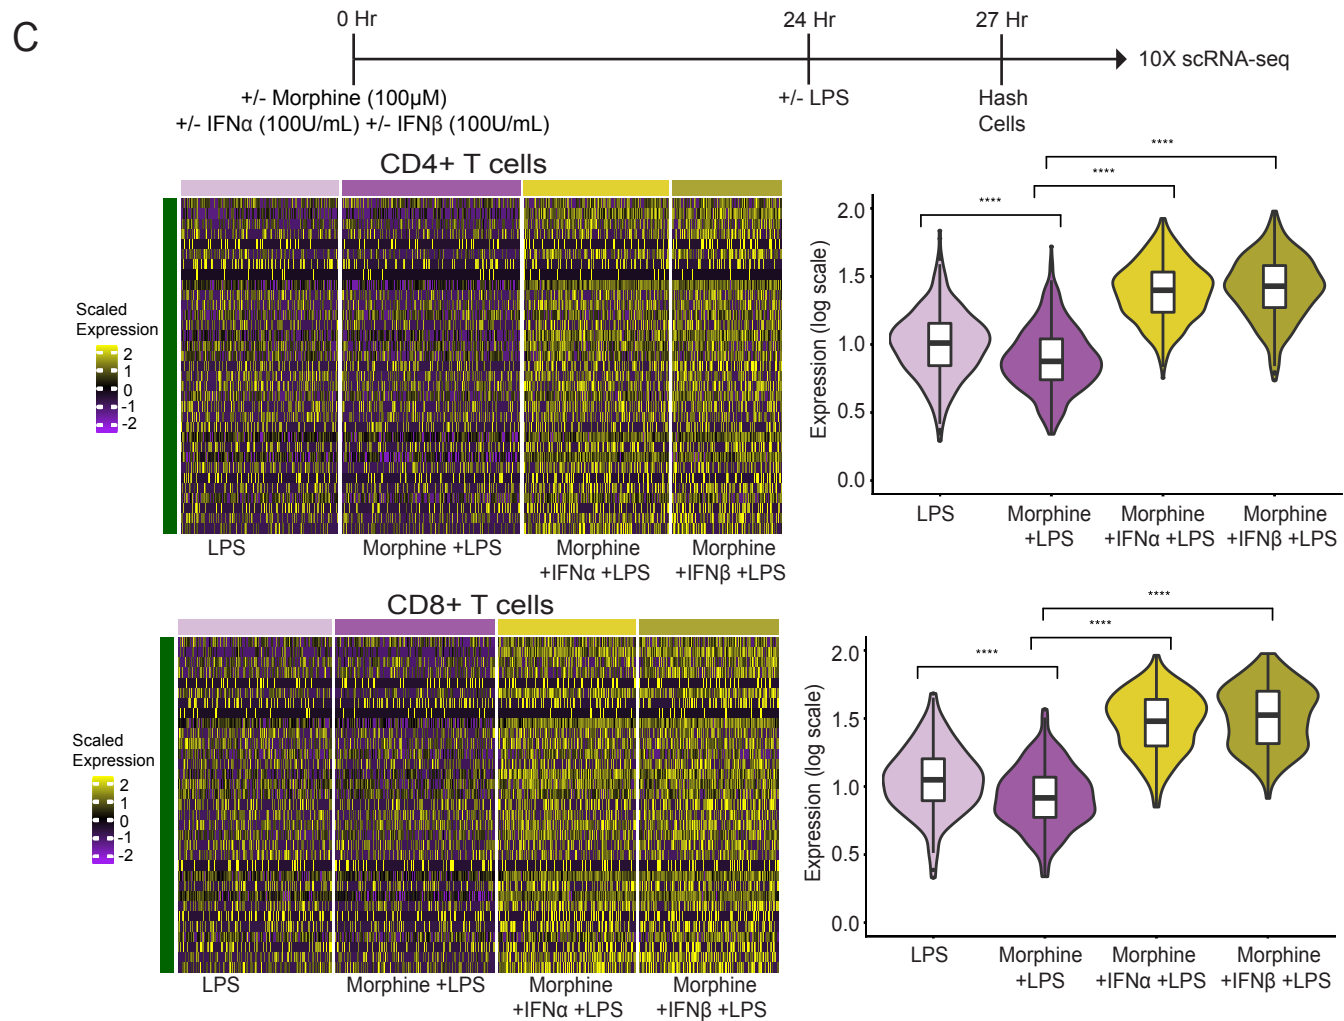

A

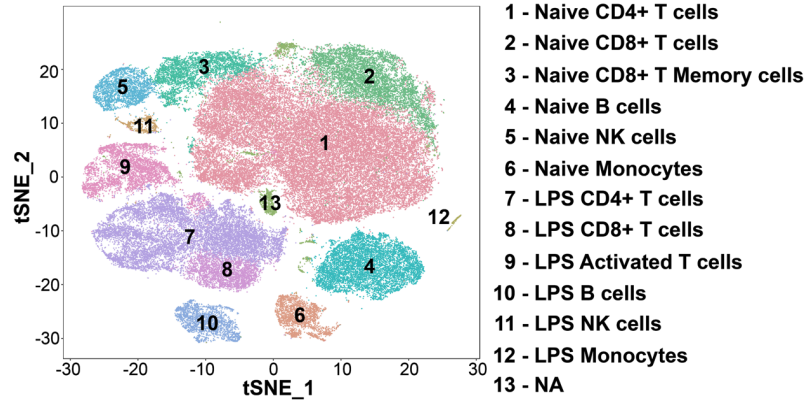

B

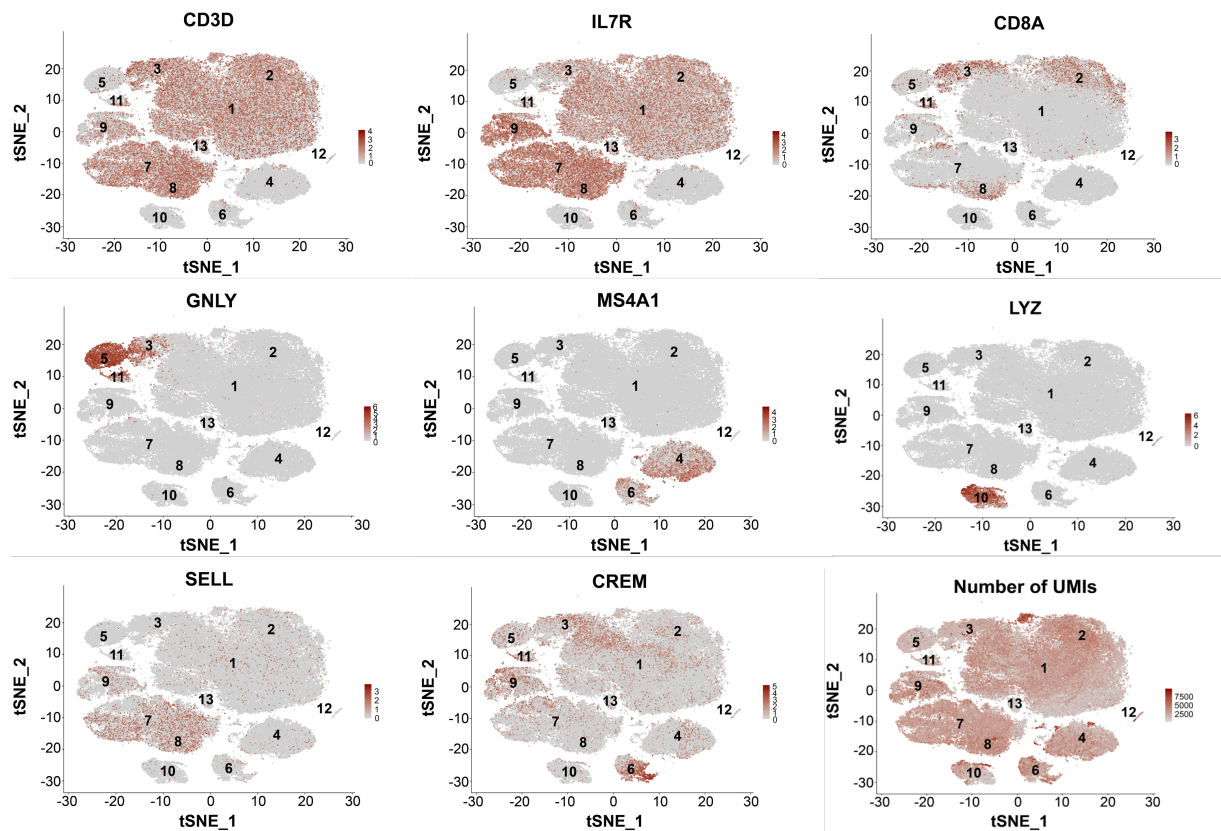

**Figure S1. Cell type identification from scRNA-seq of naive and LPS-stimulated PBMCs from opioid dependent individuals and neighborhood controls using canonical gene markers.** **a**, t-SNE plot of naive and LPS-stimulated PBMCs with identified cell types: Naive CD4+ T cells (30,388 cells), Naive CD8+ T cells (6,439 cells), Naive CD8+ memory T cells (3,588 cells), Naive B cells (6,703 cells), Naive NK cells (2,439 cells), Naive monocytes (2,220 cells), LPS-stimulated CD4+ T cells (11,308 cells), LPS-stimulated CD8+ T cells (3,019 cells), LPS-stimulated activated T cells (4,058 cells), LPS-stimulated B cells (2,225 cells), LPS-stimulated NK cells (566 cells), LPS-stimulated monocytes (261 cells), NA or no applicable cell types (1,608 cells). **b**, t-SNE projection of canonical gene marker expression and number of UMIs per cell across all naive state and LPS stimulated subpopulations: CD4+ T cells (CD3D, IL7R), CD8+ T cells (CD8A), B cells (MS4A1), Naive NK cells (GNLY), Naive Monocytes (LYZ), activated cells (CREM), naive cells (SELL).

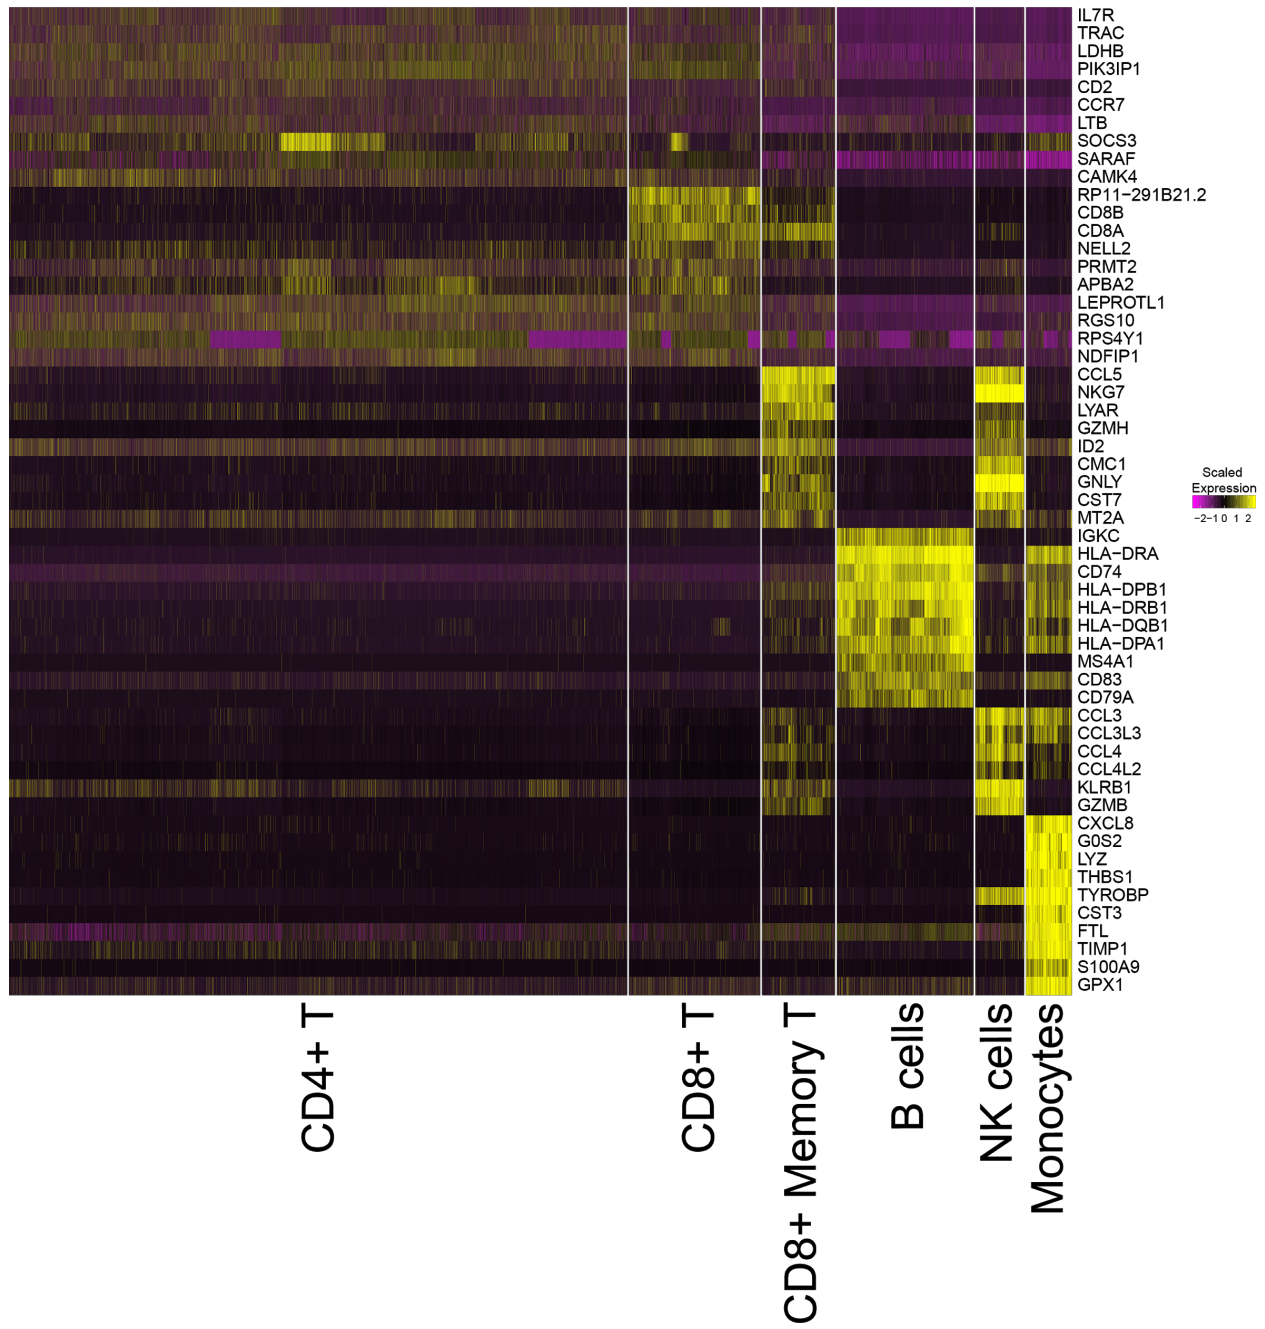



**Figure S2. Top marker genes for naive state cell types.** Heatmap of the top 10 genes expressed (scaled) across cells in each naive state population. Top 10 marker genes were identified using a wilcoxon rank sum test over all cell types: CD4+ T cells (CD4+ T), CD8+ T cells (CD8+ T), CD8+ Memory T cells (CD8+ T Memory), B cells, NK cells, and Monocytes.

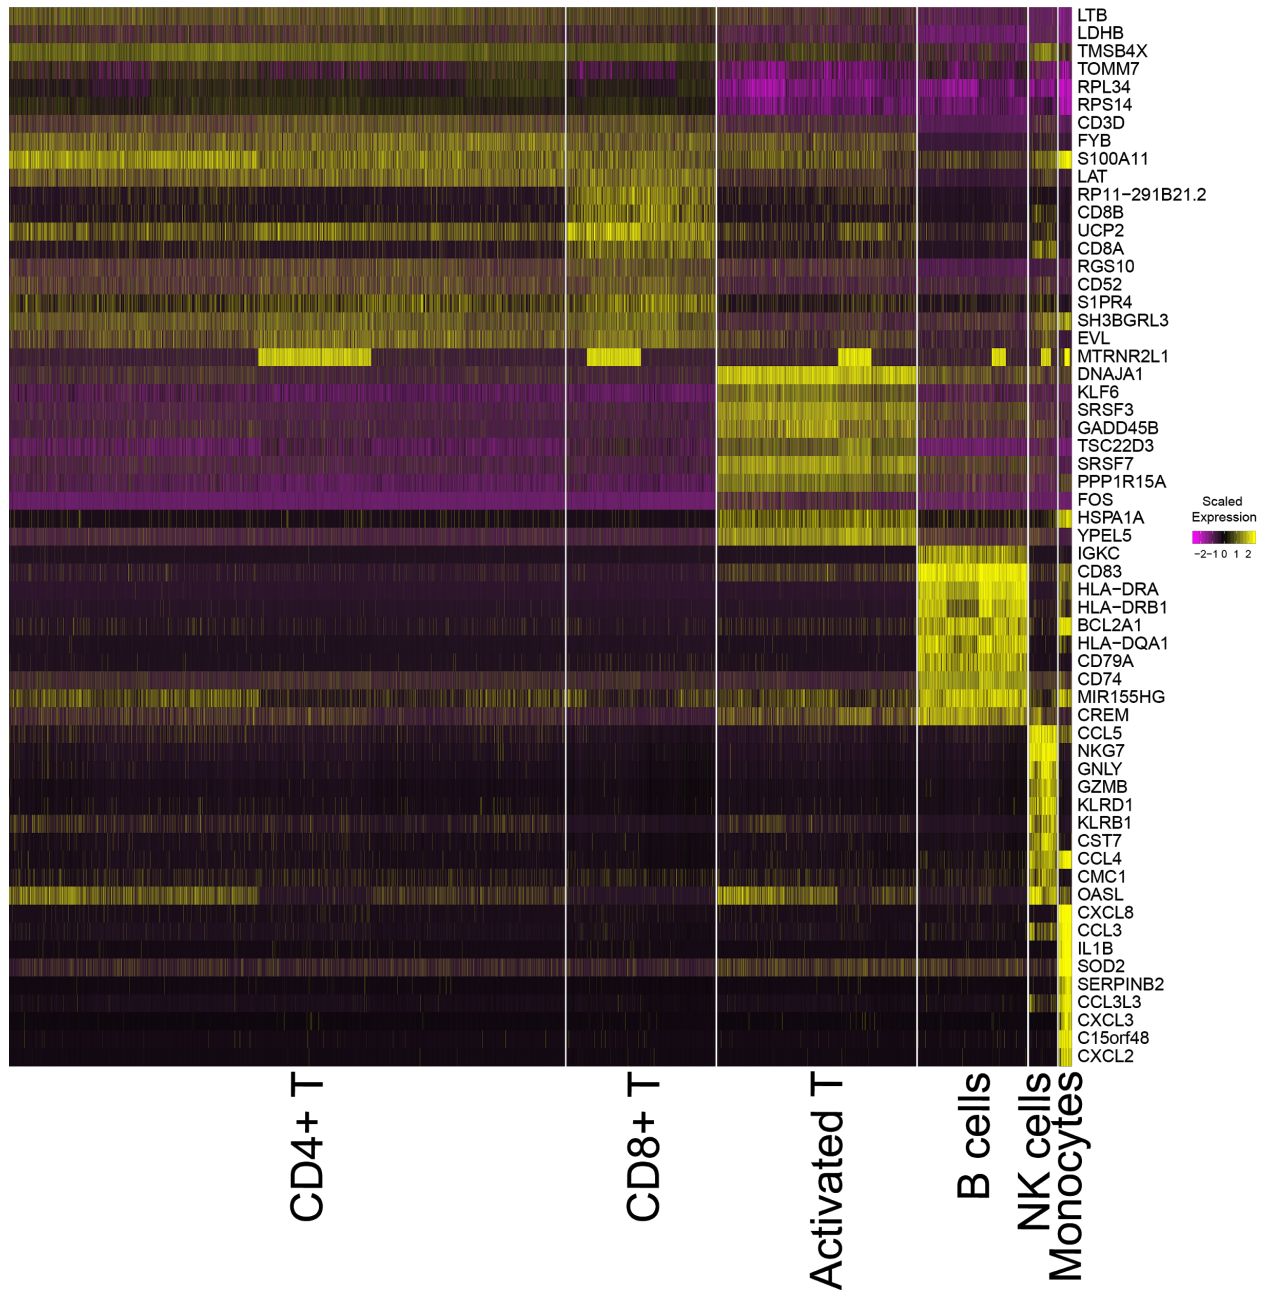

**Figure S3. Top marker genes for LPS-stimulated state cell types.** Heatmap of the top 10 gene markers expressed (scaled) across cells in each LPS-stimulated population. Top 10 marker genes were identified using a wilcoxon rank sum test over all cell types: CD4+ T cells (CD4+ T), CD8+ T cells (CD8+ T), Activated T cells (Activated T), B cells, NK cells, and Monocytes.

Naive CD4+ T cells

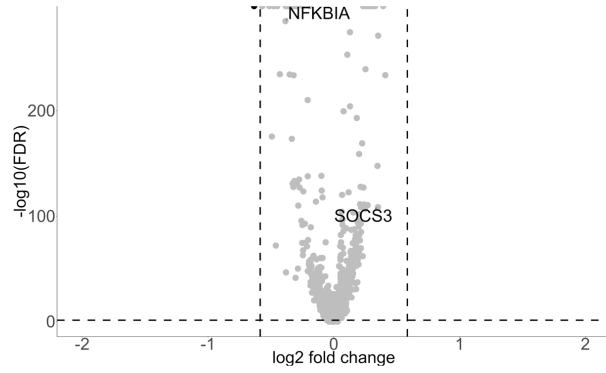

Naive CD8+ T cells

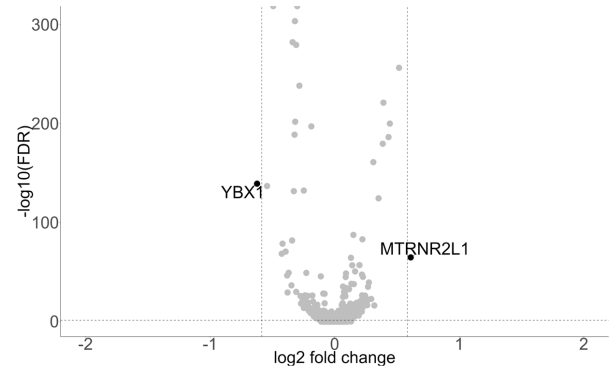

Naive CD8+ Memory T cells

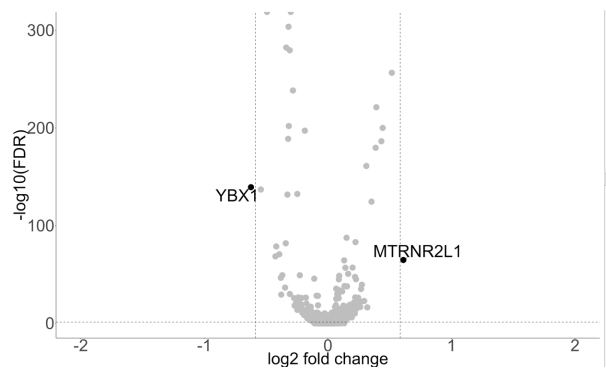

Naive B cells

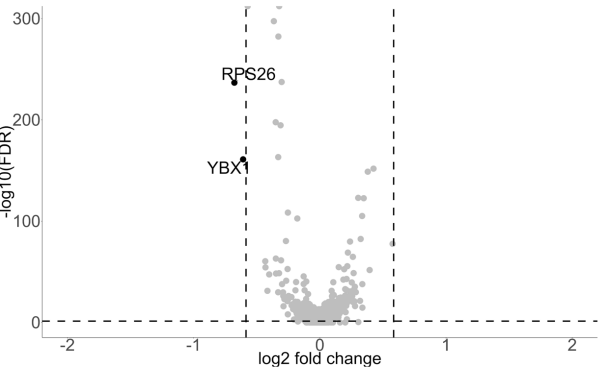

LPS CD8+ T cells

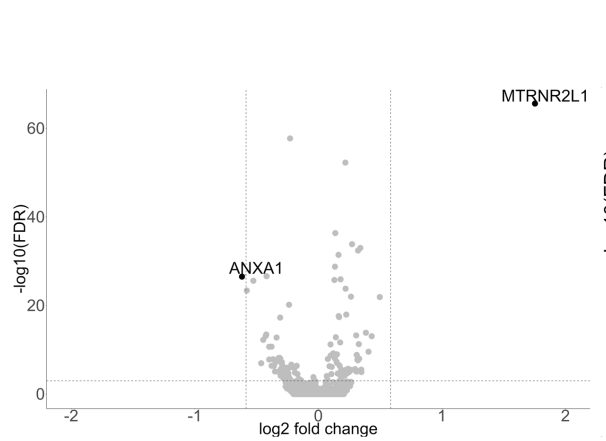

LPS B cells

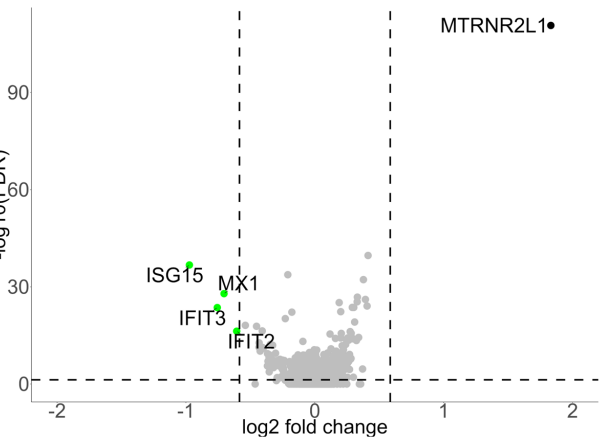

LPS Monocytes

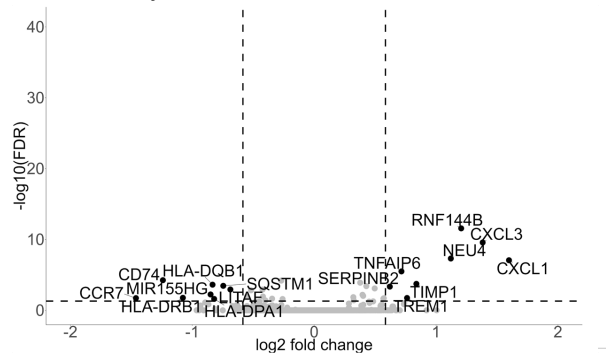

**Significance**

- not significant
- significant
- significant antiviral genes

**Figure S4. Differential gene expression analysis of opioid-dependent and neighborhood control PBMCs across naive and LPS-stimulated state cell types.**

We performed differential expression analysis within each cell type between control and opioid dependent cells (see Methods). Volcano plot showing fold change of genes (log<sub>2</sub> scale) between control and opioid-dependent cells from Naive CD4<sup>+</sup> T cells, Naive CD8<sup>+</sup> T cells, Naive CD8<sup>+</sup> Memory T cells, Naive B cells, LPS-stimulated CD8<sup>+</sup> T cells, LPS-stimulated B cells, LPS-stimulated Monocytes (x-axis) and significance of 0.05 (y-axis, -log<sub>10</sub> scale). Significant genes shown in black, significant antiviral genes shown in green, and insignificant genes shown in grey.

A

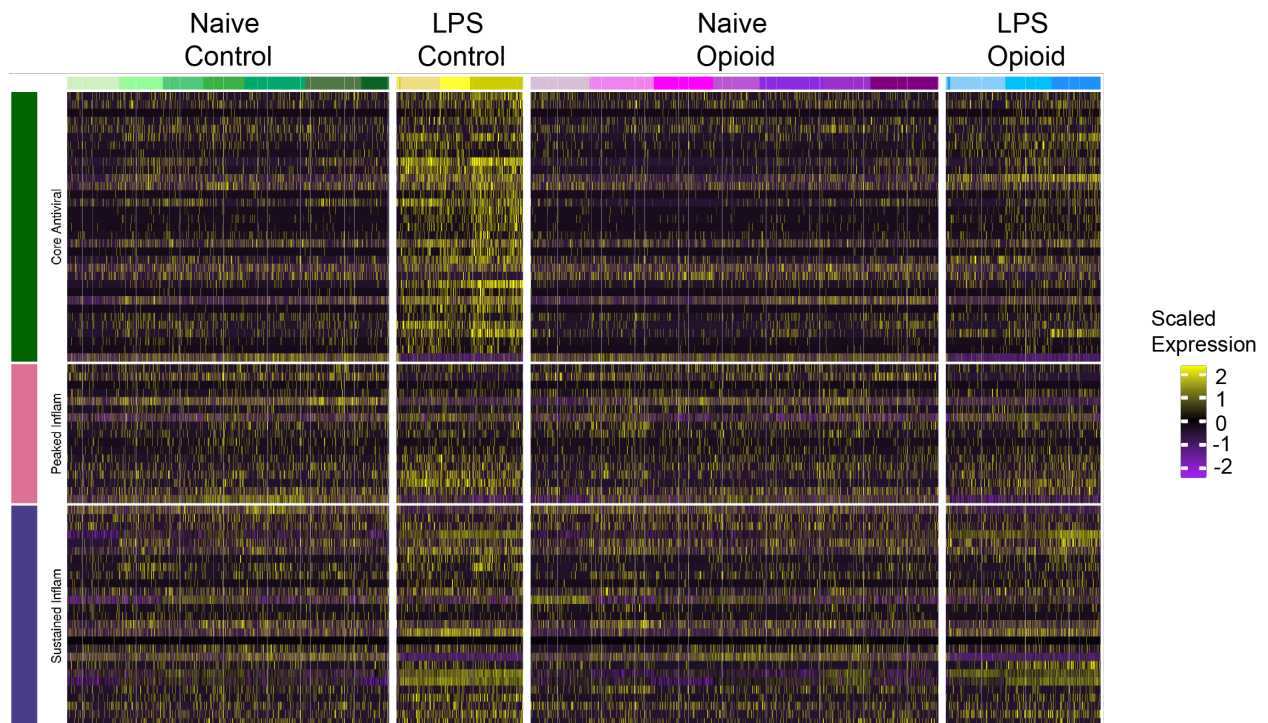

B

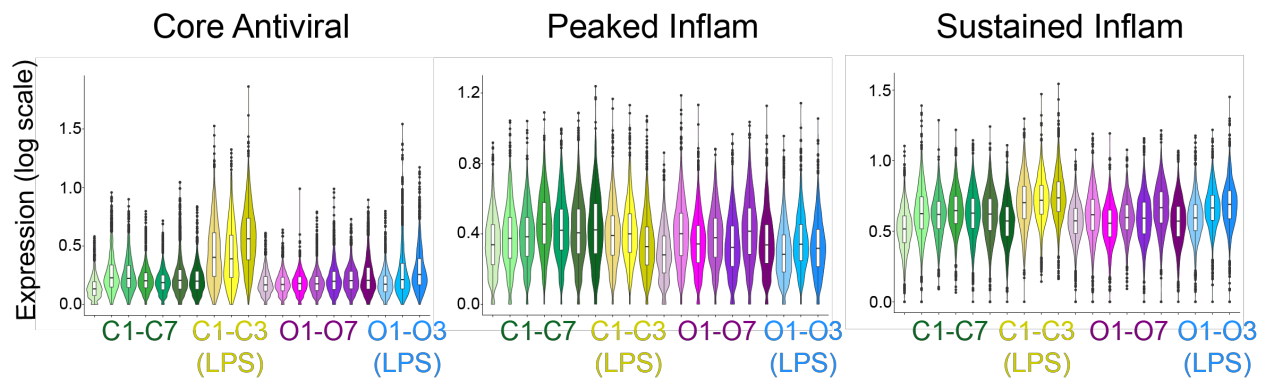

**Figure S5. Single cell gene expression heatmap of antiviral and inflammatory gene modules in CD4+ T cells.** **a**, Heatmap of scaled expression of core antiviral, peaked inflammatory, and sustained inflammatory gene modules (y-axis) : naive state control samples (Naive Control), naive state opioid-dependent samples (Naive Opioid), LPS-stimulated control samples (LPS Control), and LPS-stimulated opioid-dependent samples. **b**, Average antiviral gene set expression (log expression) across all sample cells in monocytes: C1-C7 (naive control samples 1 - 7), C1-C3 (LPS) (LPS stimulated control samples 1 - 3), O1-O7 (naive opioid dependent samples 1-7), O1-O3 (LPS) (LPS stimulated opioid dependent samples 1-3).

A

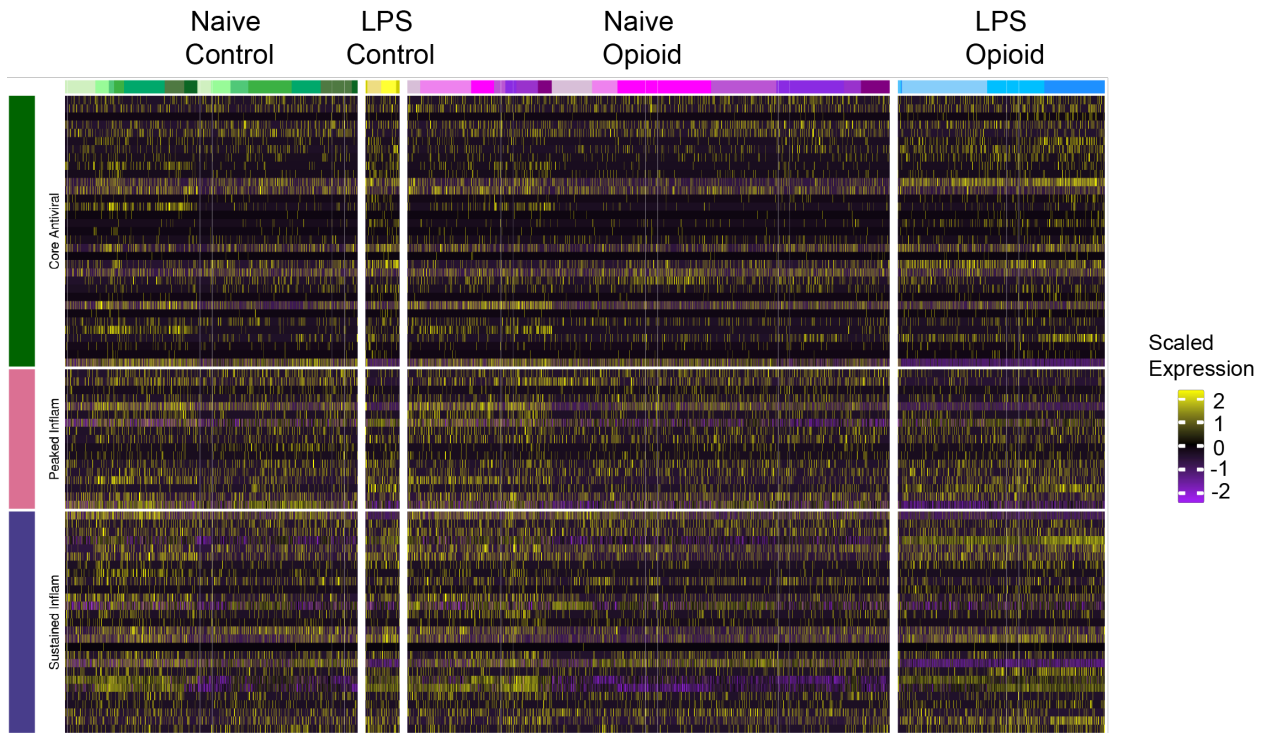

B

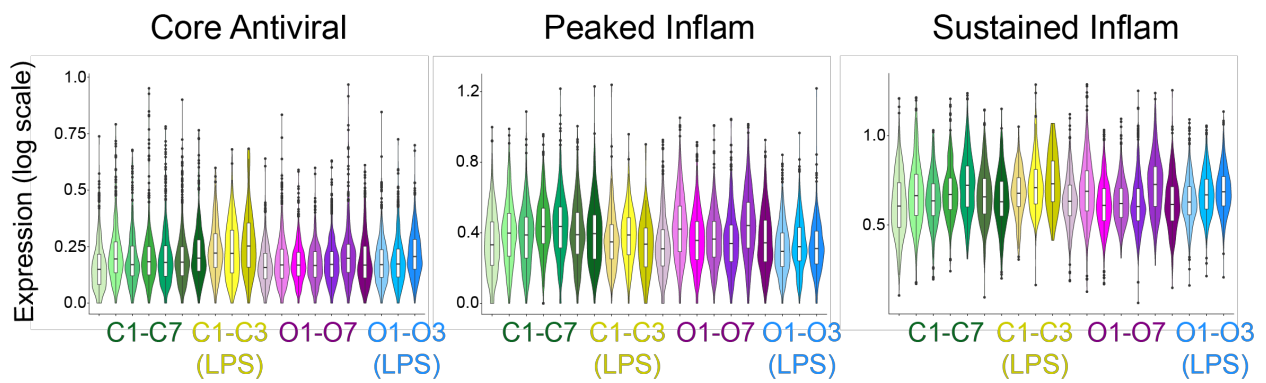



**Figure S6. Single cell gene expression heatmap of antiviral and inflammatory gene modules in CD8+ T cells.** **a**, Heatmap of scaled expression of core antiviral, peaked inflammatory, and sustained inflammatory gene modules (y-axis) for samples cells: naive state control samples (Naive Control), naive state opioid-dependent samples (Naive Opioid), LPS-stimulated control samples (LPS Control), and LPS-stimulated opioid-dependent samples. **b**, Average antiviral gene set expression (log expression) across all sample cells in monocytes: C1-C7 (naive control samples 1 - 7), C1-C3 (LPS) (LPS stimulated control samples 1 - 3), O1-O7 (naive opioid dependent samples 1-7), O1-O3 (LPS) (LPS stimulated opioid dependent samples 1-3).

A

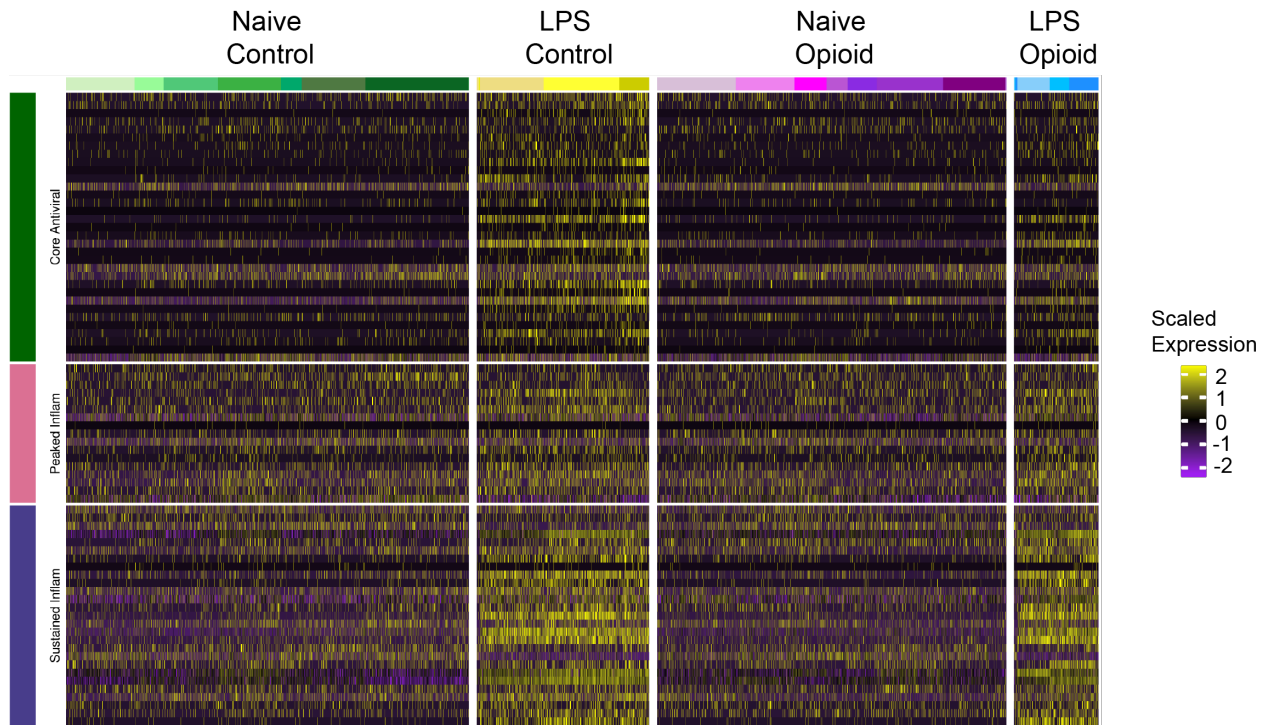

B

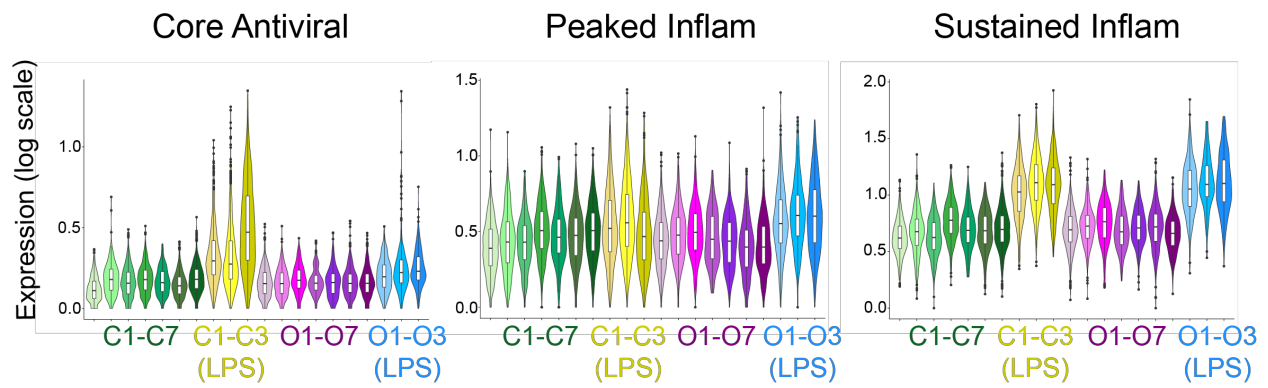

**Figure S7. Single cell gene expression heatmap of antiviral and inflammatory gene modules in B cells.** **a**, Heatmap of scaled expression of core antiviral, peaked inflammatory, and sustained inflammatory gene modules (y-axis) : naive state control samples (Naive Control), naive state opioid-dependent samples (Naive Opioid), LPS-stimulated control samples (LPS Control), and LPS-stimulated opioid-dependent samples. **b**, Average antiviral gene set expression (log expression) across all sample cells in monocytes: C1-C7 (naive control samples 1 - 7), C1-C3 (LPS) (LPS stimulated control samples 1 - 3), O1-O7 (naive opioid dependent samples 1-7), O1-O3 (LPS) (LPS stimulated opioid dependent samples 1-3).

A

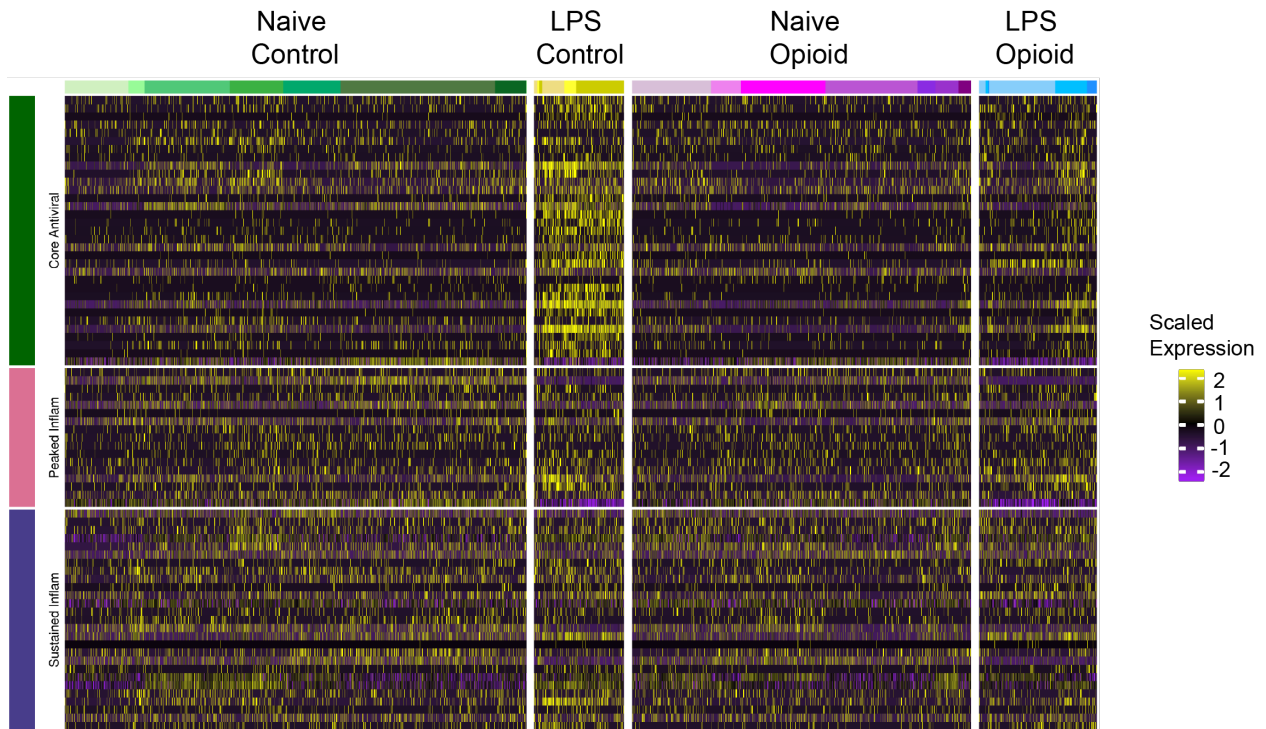

B

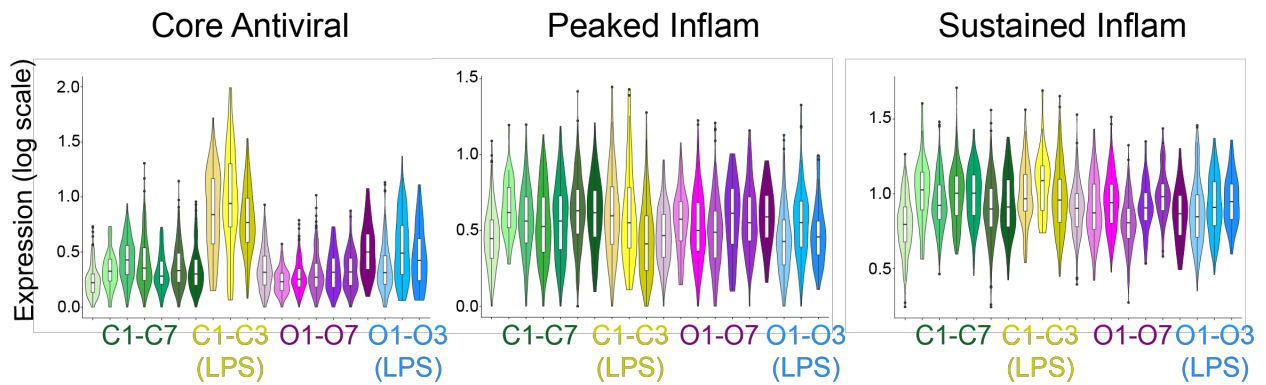

**Figure S8. Single cell gene expression heatmap of antiviral and inflammatory gene modules in NK cells.** **a**, Heatmap of scaled expression of core antiviral, peaked inflammatory, and sustained inflammatory gene modules (y-axis) : naive state control samples (Naive Control), naive state opioid-dependent samples (Naive Opioid), LPS-stimulated control samples (LPS Control), and LPS-stimulated opioid-dependent samples. **b**, Average antiviral gene set expression (log expression) across all sample cells in monocytes: C1-C7 (naive control samples 1 - 7), C1-C3 (LPS) (LPS stimulated control samples 1 - 3), O1-O7 (naive opioid dependent samples 1-7), O1-O3 (LPS) (LPS stimulated opioid dependent samples 1-3).

A

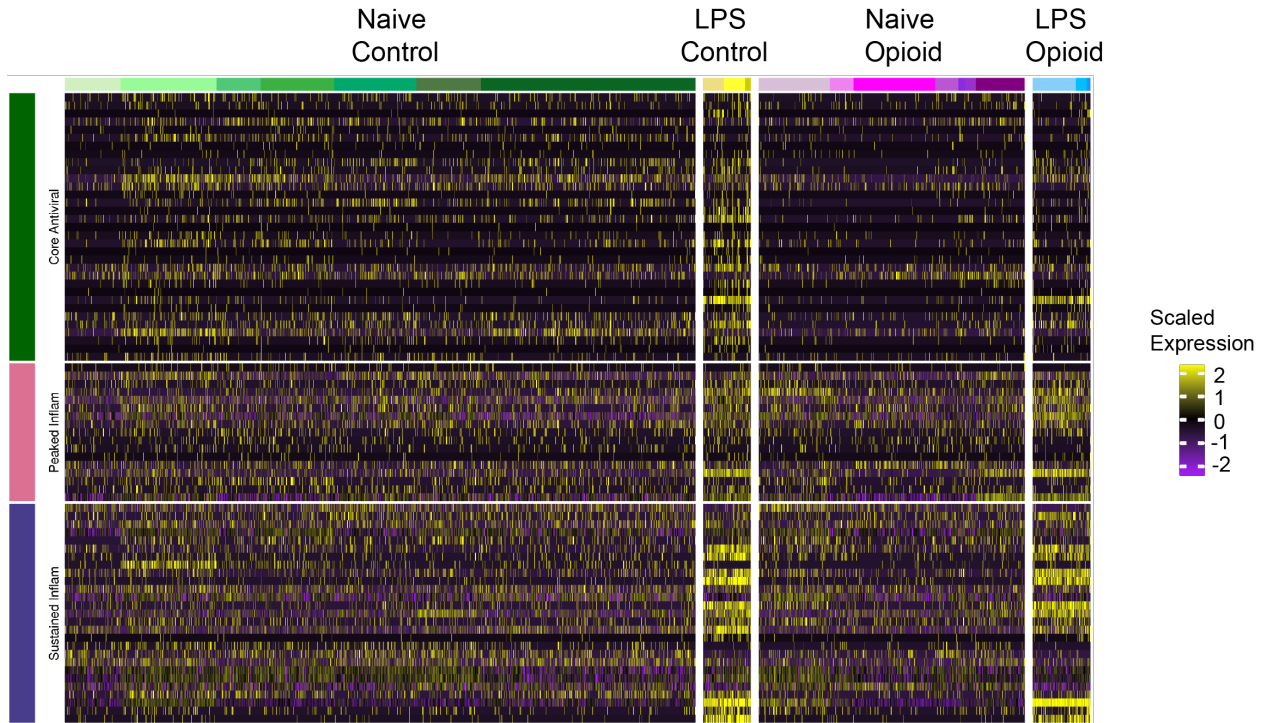

B

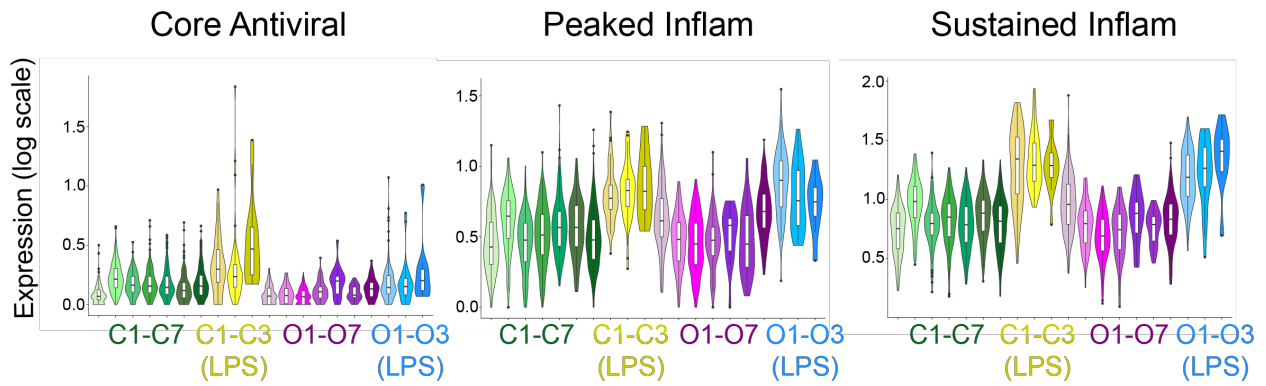

**Figure S9. Single cell gene expression heatmap of antiviral and inflammatory gene modules in monocytes.** **a**, Heatmap of scaled expression of core antiviral, peaked inflammatory, and sustained inflammatory gene modules (y-axis): naive state control samples (Naive Control), naive state opioid-dependent samples (Naive Opioid), LPS-stimulated control samples (LPS Control), and LPS-stimulated opioid-dependent samples. **b**, Average antiviral gene set expression (log expression) across all sample cells in monocytes: C1-C7 (naive control samples 1 - 7), C1-C3 (LPS) (LPS stimulated control samples 1 - 3), O1-O7 (naive opioid dependent samples 1-7), O1-O3 (LPS) (LPS stimulated opioid dependent samples 1-3).

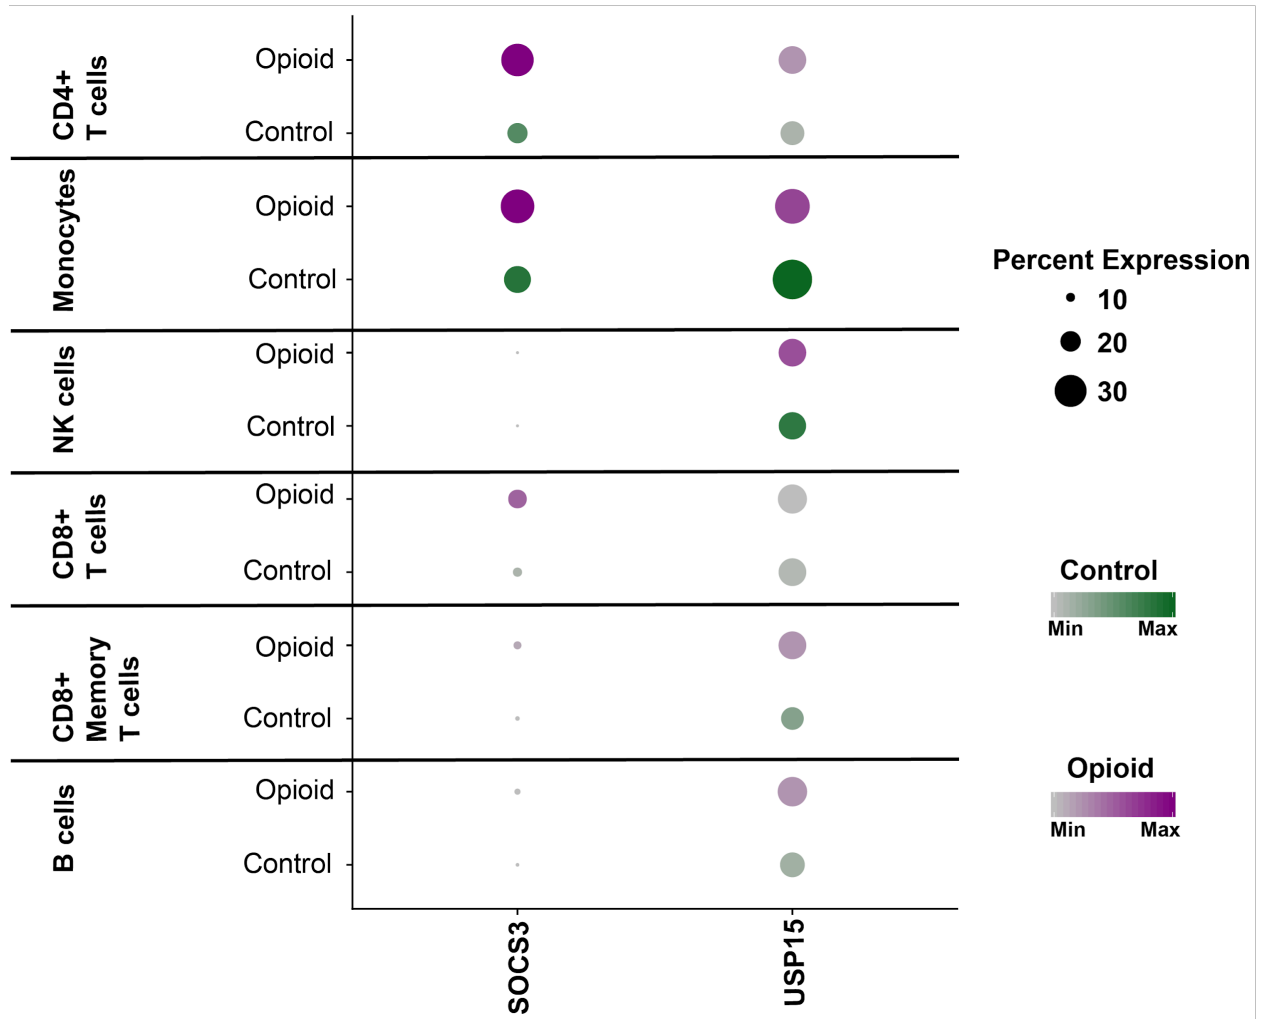



**Figure S10. Gene expression of interferon inhibitors in opioid-dependent and control cells.** Dot plot of average gene expression of negative interferon regulators SOCS3 and USP15 (x-axis) in control cells (Control) and opioid-dependent cells (Opioid) across all naive state cell types: CD4+ T cells, Monocytes, NK cells, CD8+ T cells, CD8+ Memory T cells, and B cells (y-axis).

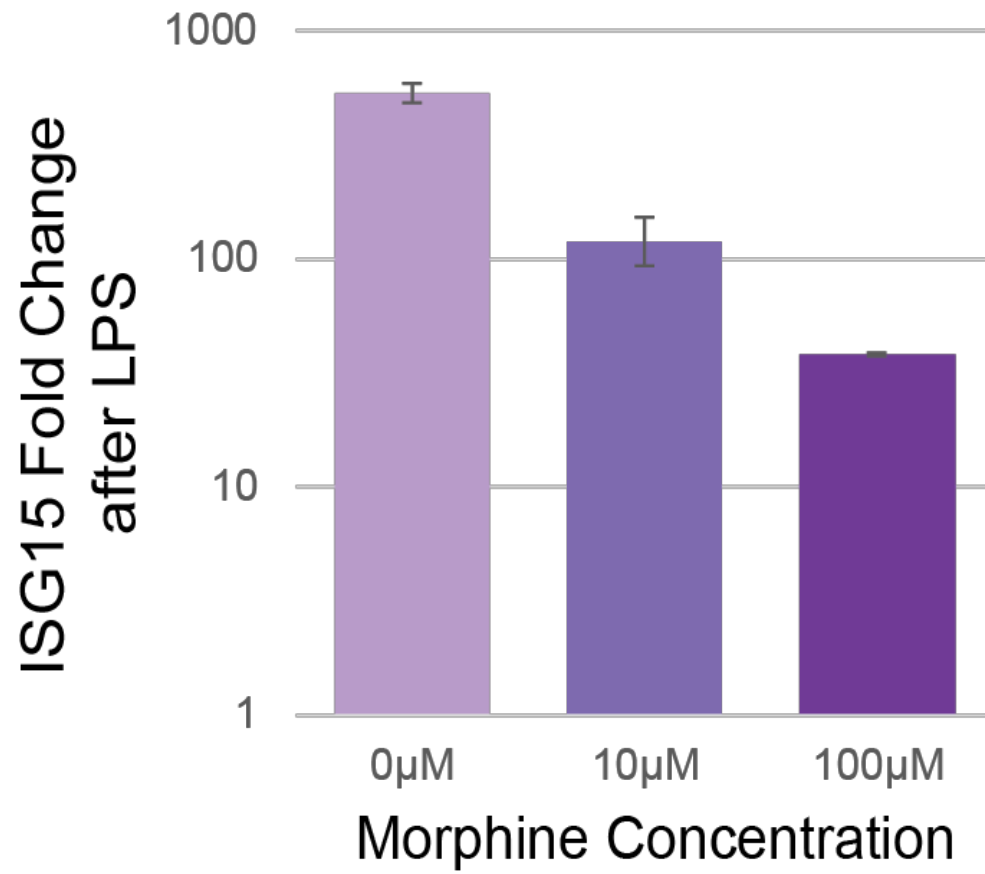

**Figure S11. Evaluation of mRNA expression level of ISG15 upon dose response to morphine stimulation for 3 hours.** PBMCs from a healthy individual were pre-treated with a titration of morphine (0uM, 10uM, 100uM) for 3 hours followed by LPS (100ng/mL) stimulation for 3 hours. Expression of interferon pathway gene ISG15 was evaluated by RT-qPCR. Values are displayed as fold increase (log10) to gene expression in LPS stimulated cells over unstimulated cells.

A

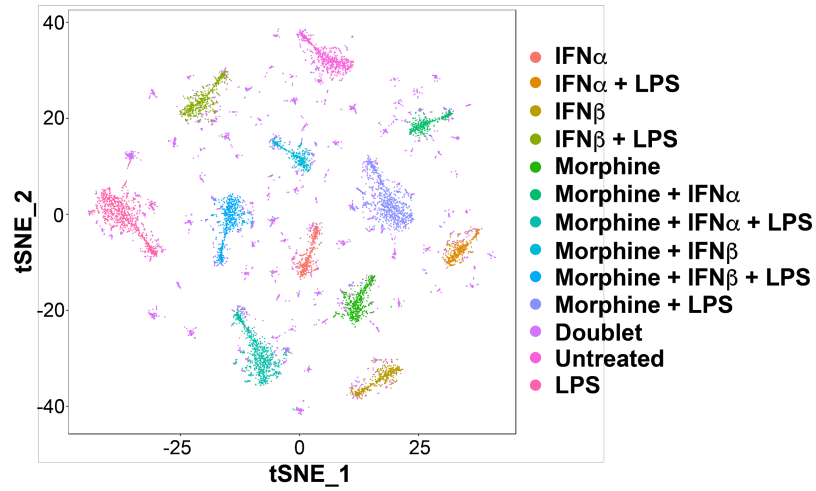

B

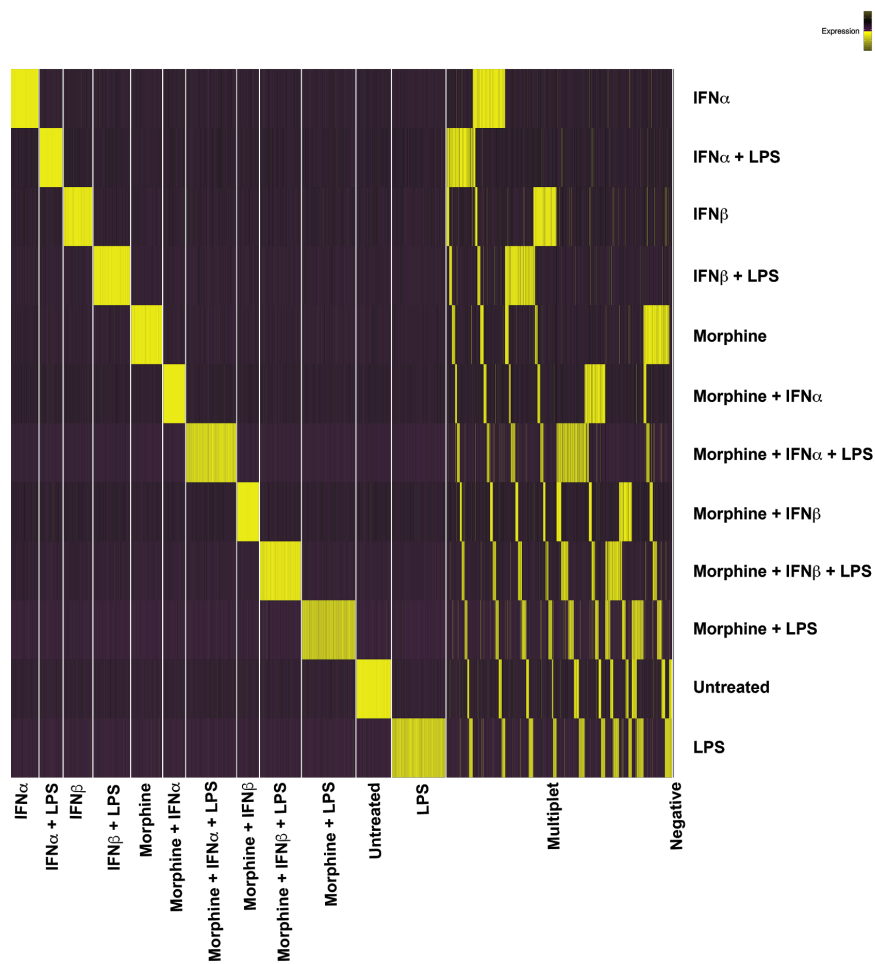

**Figure S12. Sample multiplexing of in vitro morphine-treated PBMCs using hashtag-oligo (HTO) technology.** **a**, t-SNE projection of the 10,903 HTO dataset. Cells are labelled based on sample-of-origin (12 singlet clusters with 7,176 cells) and doublets (3,721 cells). **b**, Heatmap of scaled expression of HTO sample cells and multiplets. Multiplets express more than one HTO.

A

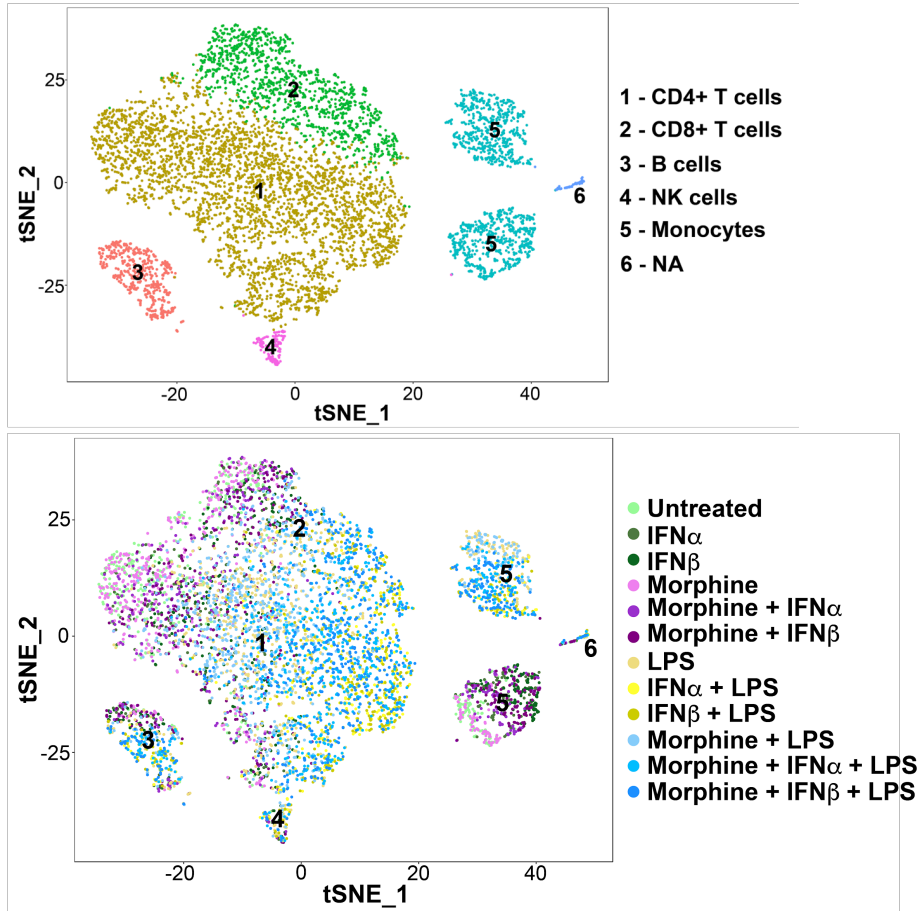

B

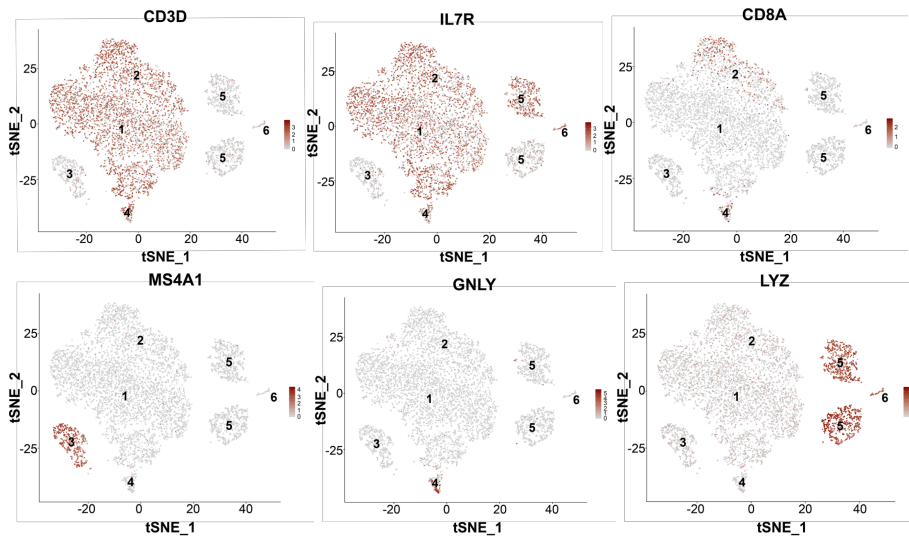

**Figure S13. Cell type identification of in vitro morphine-treated PBMCs.** **a**, t-SNE projection of unsupervised clustering of 7,176 HTO cells. We identified cell type populations (top): CD4<sup>+</sup> T cells (3,931 cells), CD8<sup>+</sup> T cells (1,310 cells), B cells (534 cells), NK cells (140 cells), Monocytes (1,198 cells), NA or non-applicable cell type (63 cells). We also colored cells by the 12 HTO samples in naive and LPS-stimulated states (bottom). **b**, t-SNE projection of canonical gene marker expression across all subpopulations: CD4<sup>+</sup> T cells (CD3D, IL7R), CD8<sup>+</sup> T cells (CD3D, CD8A), B cells (MS4A1), NK cells (GNLY), and Monocytes (LYZ).

**A**

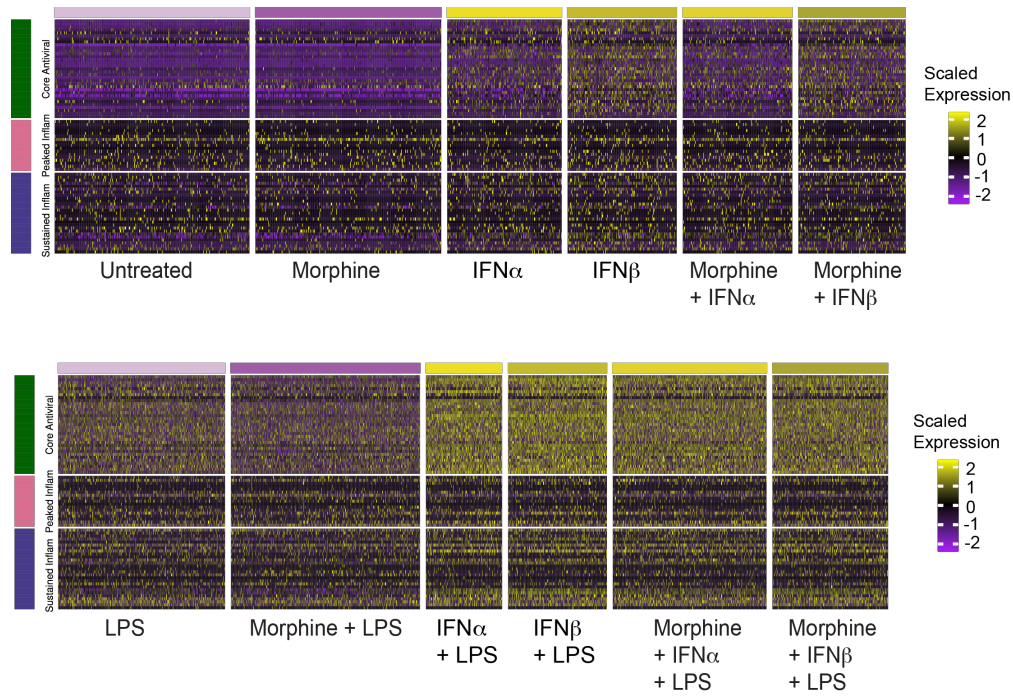

**B**

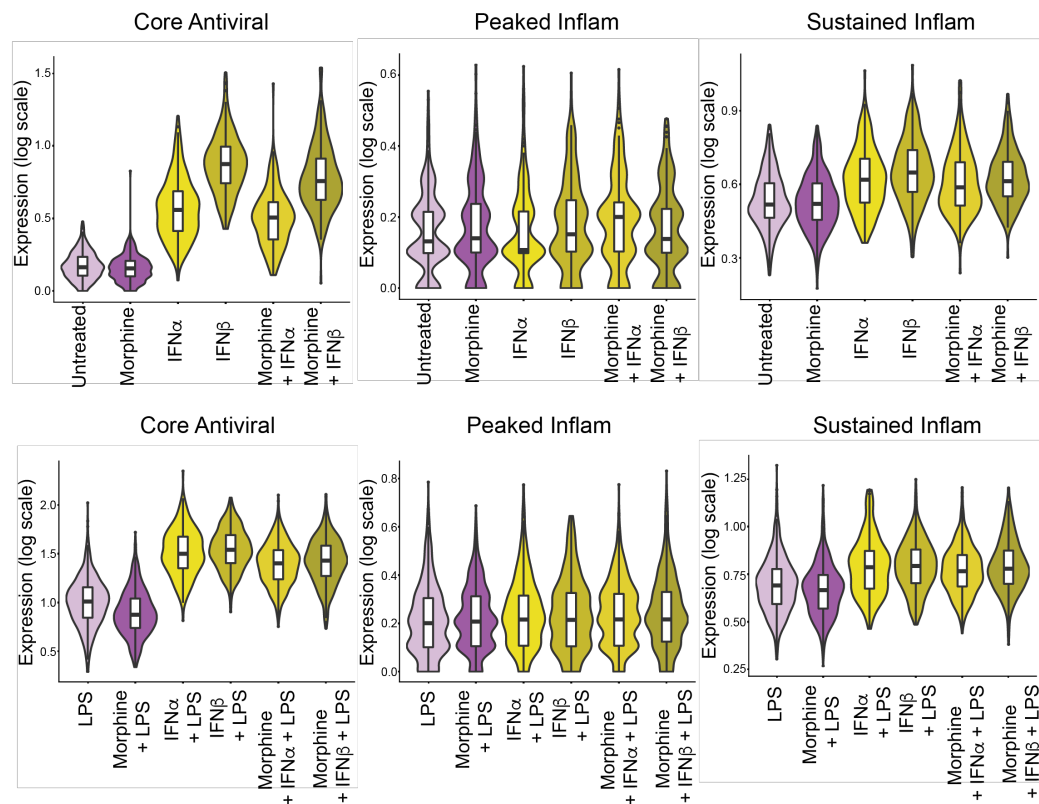



**Figure S14. Single cell gene expression heatmap of antiviral and inflammatory gene modules in in vitro treated CD4+ T cells.**

**a**, Heatmap of scaled expression of core antiviral and inflammatory genes observed across all naive state samples (top) and LPS-stimulated samples (bottom). **b**, Average antiviral gene set expression (log expression) across all naive state sample cells (top) and LPS-stimulated sample cells (bottom).

**A**

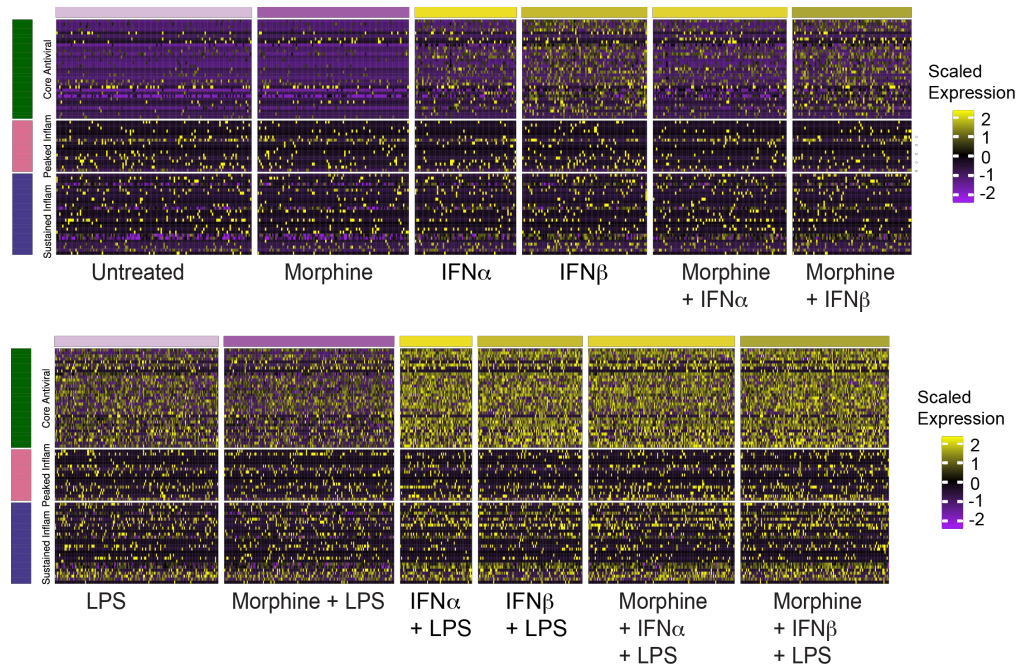

**B**

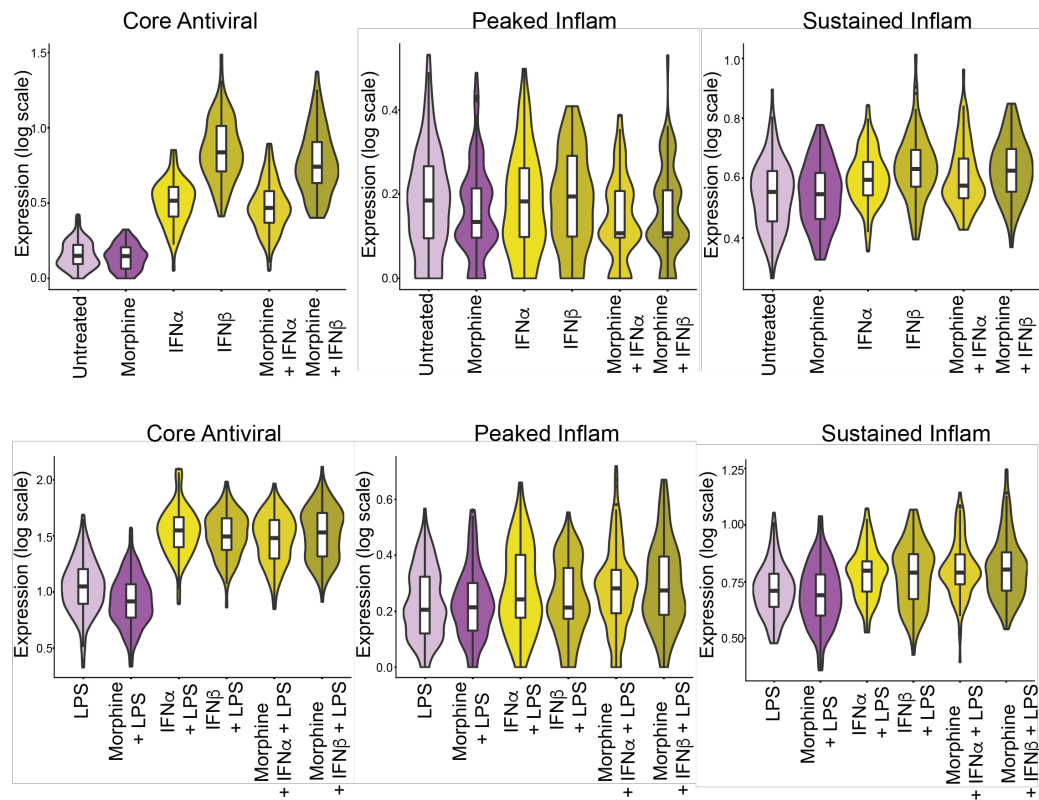

**Figure S15. Single cell gene expression heatmap of antiviral and inflammatory**

**gene modules in in vitro treated CD8+ T cells.** **a**, Heatmap of scaled expression of core antiviral and inflammatory genes observed across all naive state samples (top) and LPS-stimulated samples (bottom). **b**, Average antiviral gene set expression (log expression) across all naive state sample cells (top) and LPS-stimulated sample cells (bottom).

**A**

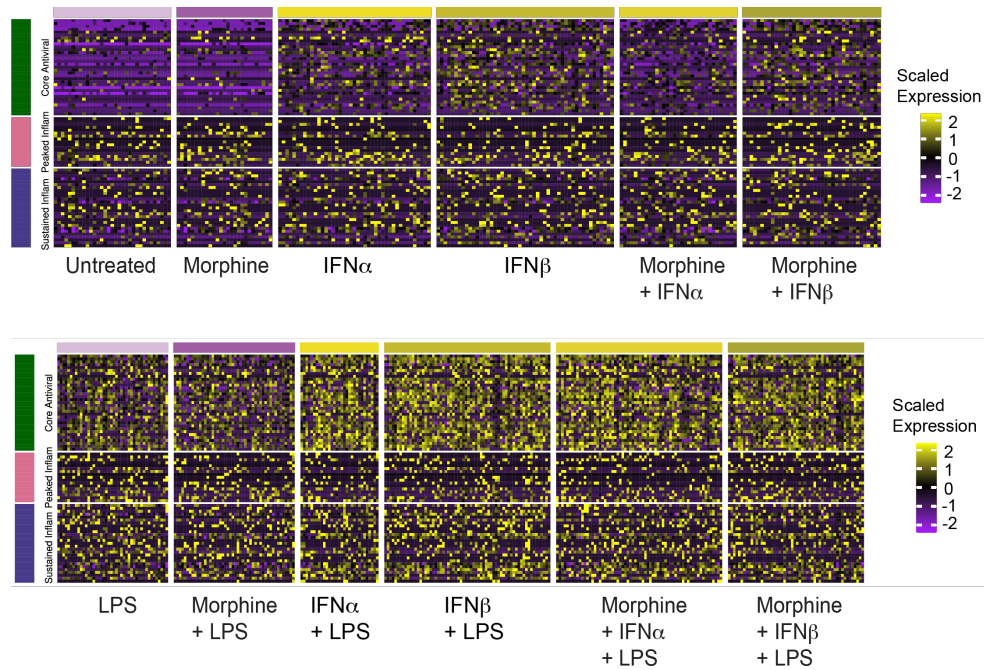

**B**

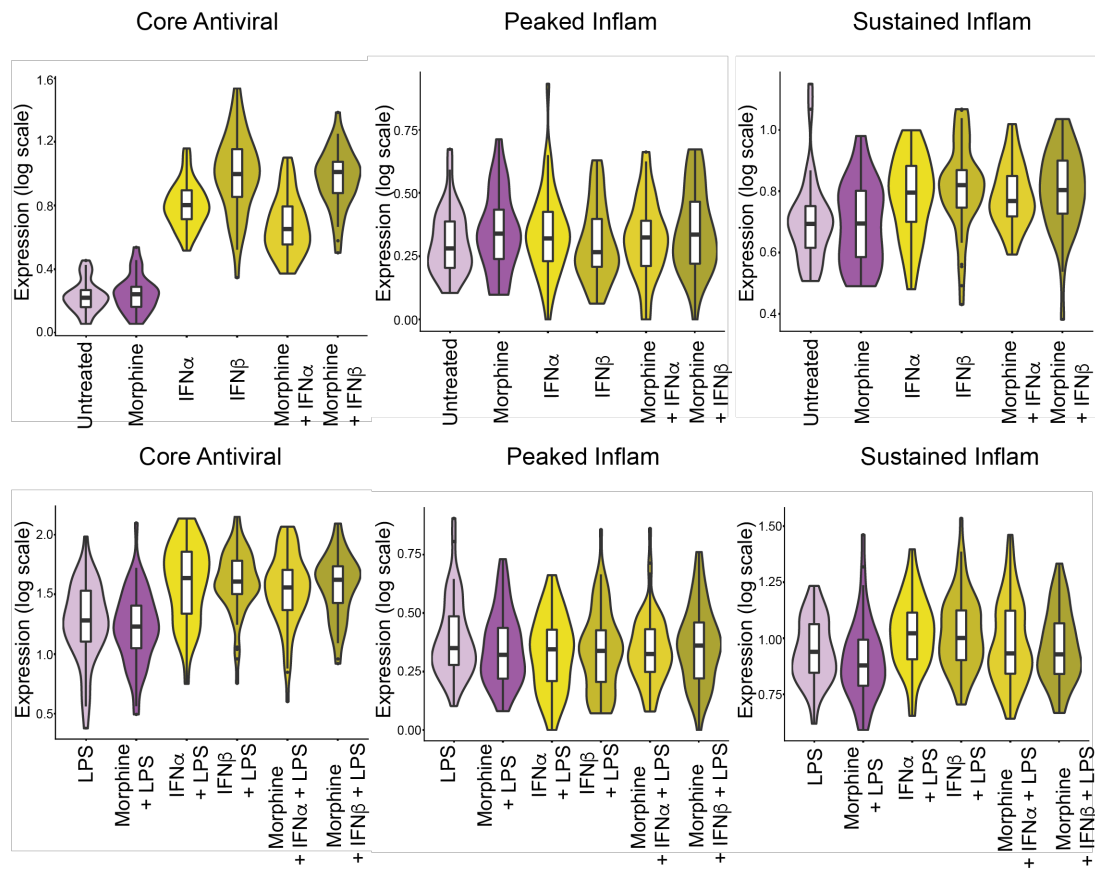

**Figure S16. Single cell gene expression heatmap of antiviral and inflammatory gene modules in in vitro treated B cells.** **a**, Heatmap of scaled expression of core antiviral and inflammatory genes observed across all naive state samples (top) and LPS-stimulated samples (bottom). **b**, Average antiviral gene set expression (log expression) across all naive state sample cells (top) and LPS-stimulated sample cells (bottom).

**A**

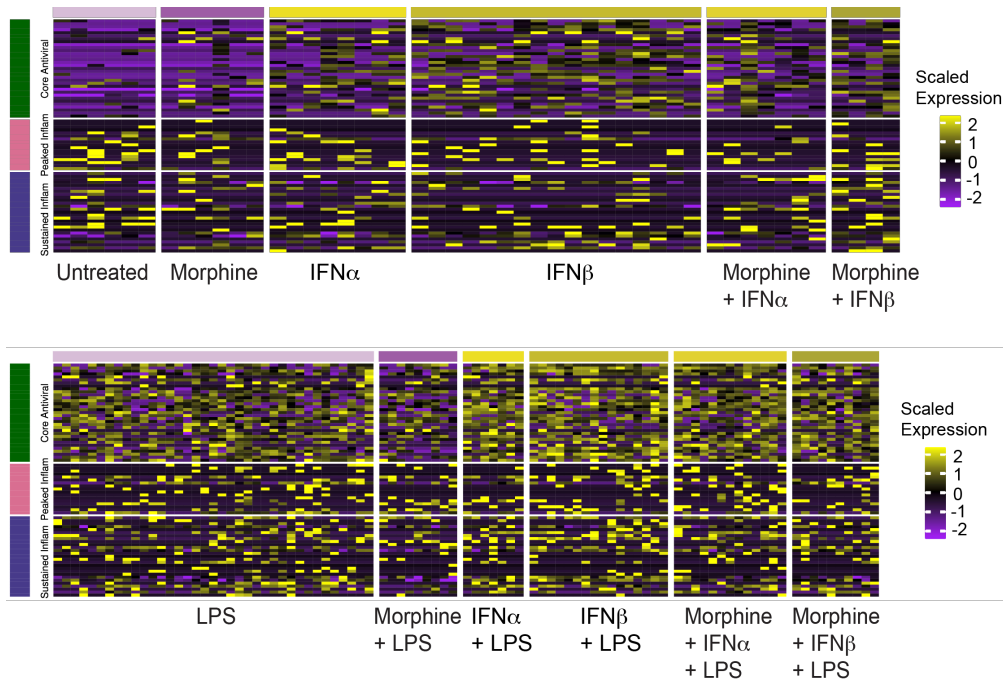

**B**

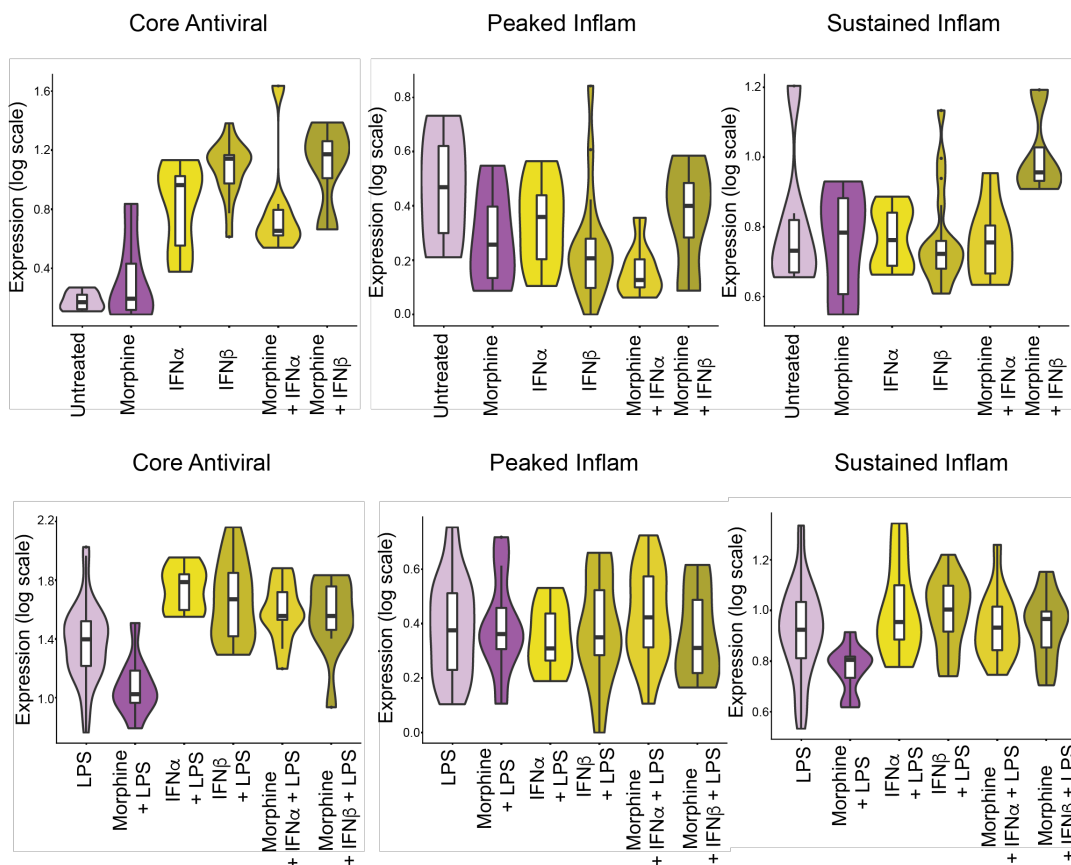

**Figure S17. Single cell gene expression heatmap of antiviral and inflammatory gene modules in in vitro treated NK cells.** **a**, Heatmap of scaled expression of core antiviral and inflammatory genes observed across all naive state samples (top) and LPS-stimulated samples (bottom). **b**, Average antiviral gene set expression (log expression) across all naive state sample cells (top) and LPS-stimulated sample cells (bottom).

**A**

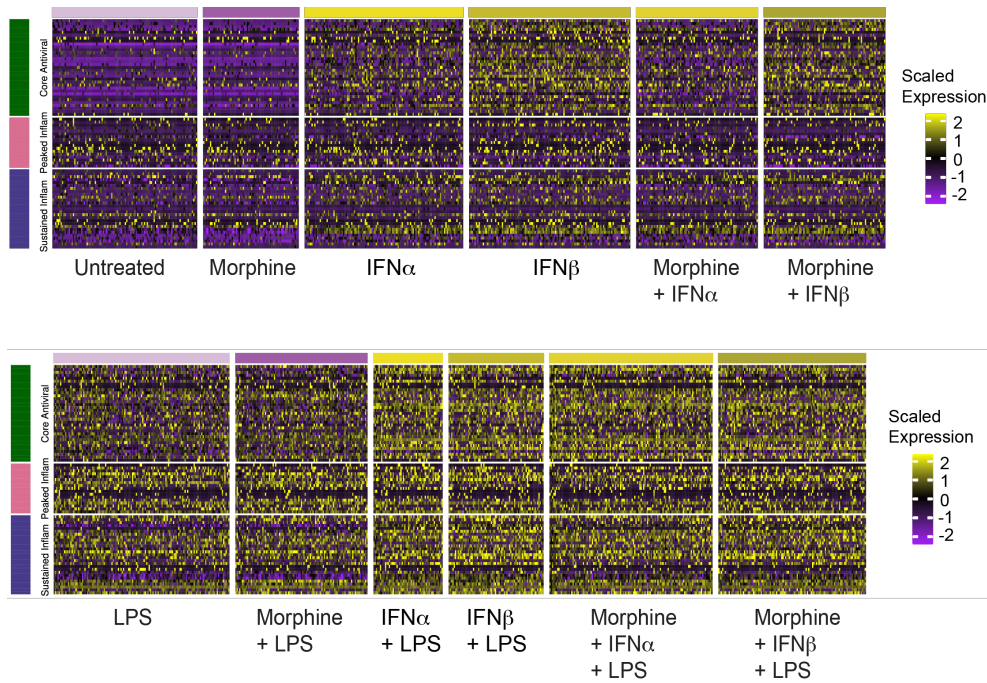

**B**

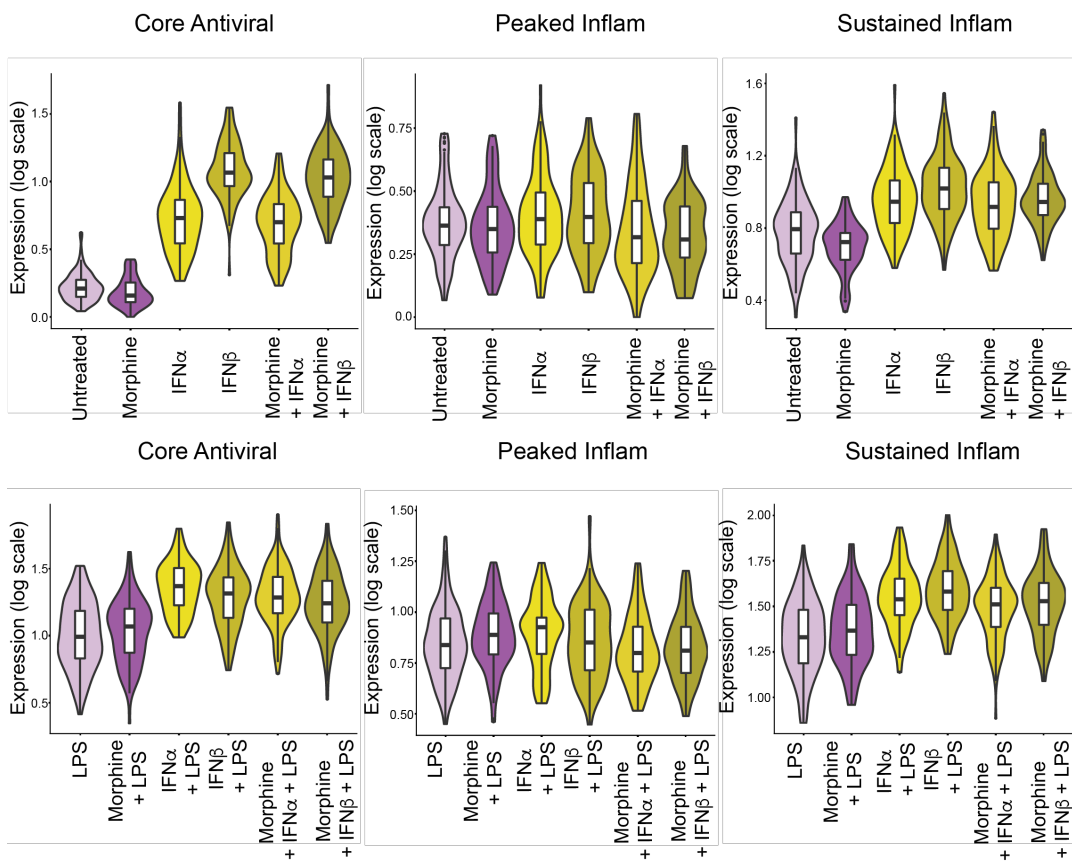



**Figure S18. Single cell gene expression heatmap of antiviral and inflammatory gene modules in in vitro treated Monocytes.** **a**, Heatmap of scaled expression of core antiviral and inflammatory genes observed across all naive state samples (top) and LPS-stimulated samples (bottom). **b**, Average antiviral gene set expression (log expression) across all naive state sample cells (top) and LPS-stimulated sample cells (bottom).
